# Supplementary material for: Thiophene fused indenocorannulenes: synthesis, variable emission, and exceptional chiral configurational stability
Source: Royal Society of Chemistry journal article supplement (doi:10.1039/d1qo00596k), 2021-01-01
Supplement: d1qo00596k1.pdf [file d1qo00596k1.pdf]

# Thiophene fused indenocorannulenes

Xiaoqi Tian,<sup>a</sup> Suchaya Chaiworn,<sup>a</sup> Jun Xu,<sup>a</sup> Nicolas Vanthuyne,<sup>b</sup> Kim K. Baldridge,<sup>a\*</sup>  
and Jay S. Siegel<sup>a\*</sup>

<sup>a</sup> Health Science Platform, Tianjin University 92 Weijin Road, Nankai District, Tianjin 300072, China

<sup>b</sup> Aix Marseille Université, CNRS, Centrale Marseille, iSm2, 13007, Marseille, France

# Table of contents

|                                                                                 |    |
|---------------------------------------------------------------------------------|----|
| <b>1. Materials and methods</b>                                                 | 3  |
| 1.1 General and instruments                                                     | 3  |
| 1.2 Computational data                                                          | 4  |
| <b>2. Synthetic procedures and analyses</b>                                     | 5  |
| 2.1 Synthesis of compound 2                                                     | 5  |
| 2.2 Synthesis of compound 3                                                     | 6  |
| 2.3 Synthesis of compound 5                                                     | 6  |
| 2.4 Synthesis of compound 6                                                     | 7  |
| 2.5 Synthesis of compound 8                                                     | 8  |
| 2.6 Synthesis of compound 9                                                     | 9  |
| 2.7 Synthesis of compound 11                                                    | 10 |
| 2.8 Synthesis of compound 12                                                    | 11 |
| <b>3. Cyclic voltammetric measurements</b>                                      | 12 |
| <b>4. Enantiomeric separation of 3a/3b</b>                                      | 13 |
| 4.1 Analytical HPLC separation for the enantiomers 3a/3b                        | 13 |
| 4.2 Semi-preparative separation of enantiomers 3a/3b                            | 13 |
| <b>5. Enantiomeric separation of 12a/12b</b>                                    | 15 |
| 5.1 Analytical HPLC separation of the enantiomers 12a/12b                       | 15 |
| 5.2 Semi-preparative separation of enantiomers 12a/12b                          | 15 |
| <b>6. Optical rotations</b>                                                     | 17 |
| <b>7. Kinetic studies of enantiomerization</b>                                  | 17 |
| <b>8. Electronic circular dichroism</b>                                         | 21 |
| <b>9. Vibrational circular dichroism</b>                                        | 23 |
| <b>10. X-ray crystal structure</b>                                              | 24 |
| <b>11. <sup>1</sup>H-NMR and <sup>13</sup>C-NMR</b>                             | 28 |
| <b>12. Onset wavelength (<math>\lambda_{\text{onset}}</math>) determination</b> | 36 |
| <b>13. Literature</b>                                                           | 38 |

# 1. Materials and methods

## 1.1 General and instruments

Unless otherwise stated, all commercially available reagents and solvents were used as received without further purification. Flash chromatography was performed on silica gel 100-200 m. Thin layer chromatography (TLC) was performed on glass backed plates pre-coated with silica (GF254), which were developed using standard visualizing agents. All optical measurements were performed in HPLC grade dichloromethane. UV-Vis measurements were carried out on HITACHI U-3900. Infrared spectra (IR) were recorded on a *JASCO FT/IR-4100 Fourier Transform Infrared Spectrometer*. IR frequencies are given in  $\text{cm}^{-1}$ . Signal intensities are presented as weak (w), medium (m), strong (s) and very strong (vs). NMR spectra were recorded on *Bruker AV-400/600* (400/600 MHz) instruments. The chemical shift ( $\delta$ ) is shown in ppm and referenced against the corresponding solvent peaks (for  $\text{CDCl}_3$ ,  $^1\text{H}$ -NMR: 7.26 ppm;  $^{13}\text{C}$ -NMR: 77.16 ppm). Data is reported as follows: chemical shift in ppm, multiplicity (s = singlet, d = doublet, t = triplet, q = quartet, m = multiplet, dd = doublet of doublet, dt = doublet of triplet), coupling constant ( $J$ ) in Hz, and integration. Fluorescence excitation/emission measurements were carried on *Edinburgh FLS980* spectrophotometer, using 450W Xenon arc lamp, with excitation and emission slit widths at 1 nm. Emission spectra were obtained by exciting at the longest wavelength excitation maximum. Fluorescence lifetimes were measured using nanosecond flash lamp with computer controlled power supply, for solutions with O.D.  $\sim 0.1$ . Absolute quantum yields were measured using an integrating sphere accessory. Microwave reactions were performed in a *CEM Discover Microwave Reactor* with integrated active cooling. All cyclic voltammetry measurements were performed using a *CHI600E Electrochemical Analyzer*, *CH Instruments, Inc.* and in THF solvent with a scan rate of 0.1 V/s. THF was of HPLC grade and distilled over  $\text{CaH}_2$  prior to its use. Tetrabutylammonium hexafluorophosphate (TBAH) was used as an electrolyte. Non-Aqueous  $\text{Ag}/\text{Ag}^+$  was used as reference electrode (10 mM  $\text{AgNO}_3$  in 0.1 M  $\text{Bu}_4\text{NPF}_6$  in acetonitrile), platinum wire as counter electrode and glassy carbon as working electrode for all measurements. All  $E_{1/2}$  potentials are directly obtained from cyclic voltammetric curves as averages of the cathodic and anodic peak potentials. Ferrocene was used as an internal standard. The standard potential of ferrocinium/ferrocene couple in THF (+0.085 V) was used to calibrate all voltammetry plots. High-resolution

mass spectra (HRMS) recorded for accurate mass analysis, were performed on either a Q-TOF micro (Bruker Compass Data Analysis 4.0) spectrometer. The ECD spectrometer was purged with nitrogen before recording each spectrum, which was baseline subtracted. The baseline was always measured for the same solvent and in the same cell as the samples. The spectra are presented without smoothing and further data processing. VCD spectra were measured on ChiralIR-2X with 300  $\mu\text{m}$  cell,  $\text{CHBr}_3$  as solvent. The crystal structures were obtained from Rigaku XtalAB PRO MM007 DW.

## 1.2 Computational data

The structural and energetic analyses of the molecular systems for all compounds described in this study were carried out with the B97-D dispersion enabled density functional method,<sup>1,2</sup> using an ultrafine grid, together with the Def2-TZVPP basis set.<sup>3</sup> Full geometry optimizations were performed and uniquely characterized via second derivatives (Hessian) analysis to establish stationary points and effects of zero point and thermal energy contributions. Absorption energies were computed in acetonitrile at the TD-wB97xD<sup>4</sup>/Def2-TZVPP(ACN) level of theory. From the TD-DFT results, spectra were simulated from the excitation energies and rotation lengths by overlapping Gaussian functions  $f$  for each transition. VCD was performed in bromoform at the B97-D/Def2-TZVPP( $\text{CHBr}_3$ ) level of theory. The simulated VCD spectrum consists of a sum of Lorentzian distributions centered on the computed frequencies, with fixed width and with the height proportional to the computed rotational constant. Reduction potential data was determined in tetrahydrofuran at the B97-D/Def2-TZVPP(THF) level of theory, using  $E^\circ = -\Delta H/nF$ , where  $n = 1$ ,  $F = 1 \text{ eV}$ , and referenced to Ag/AgCl. The Strumm and Morgan correction<sup>5</sup> for 0.1 M AgCl/Ag of 0.29 was used in combination with the value for the SHE electrode, giving  $4.73 = 4.44 (\text{SHE}) + 0.29 (0.1 \text{ M AgCl/Ag})$ , for the reference value. Effects of solvent employed the COSMO:*ab initio* continuum method<sup>6,7</sup> using a dielectric as in experiment, and radii of Klamt.<sup>8</sup> Visualization and analysis of structural and property results were obtained using Avogadro<sup>9</sup> and GaussView (for spectra).<sup>10</sup>

## 2. Synthetic procedures and analyses

### 2.1 Synthesis of compound 2

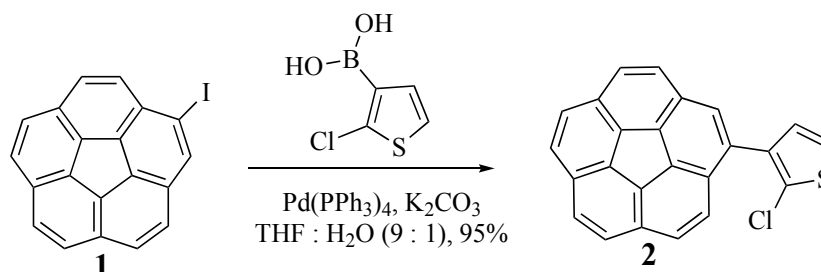

40 mg (0.107 mmol, 1 eq) of iodocorannulene **1**, 35 mg (0.214 mmol, 2 eq) of 2-chlorothiophene-3-boronic acid, 6.2 mg (0.00535 mmol, 0.05 eq) of tetrakis(triphenylphosphine)palladium, 45 mg (0.321 mmol, 3 eq) of potassium carbonate, and a total 1 mL of 9:1 ratio of THF to water were added to a sealed tube. The reaction mixture was degassed using nitrogen and then heated to 100°C for 22 h. When the reaction is completed, the reaction mixture was cooled to room temperature then 5 mL water and 5 mL ethyl acetate was added, dichloromethane was used to wash the aqueous phase (twice), the organic phase was dried over anhydrous  $\text{Na}_2\text{SO}_4$  and concentrated under reduced pressure. The product was purified by silica column chromatography to give 37 mg of **2** as a yellow solid (95%).

$^1\text{H}$  NMR (400 MHz, Chloroform-*d*)  $\delta$  7.89 (s, 1H), 7.85 (s, 2H), 7.83 (s, 2H), 7.82 – 7.81 (m, 2H), 7.79 (d,  $J = 8.8$ , 1H), 7.69 (d,  $J = 8.8$ , 1H), 7.27 (d,  $J = 6$ , 1H), 7.19 (d,  $J = 6$ , 1H).

$^{13}\text{C}$  NMR (101 MHz, Chloroform-*d*)  $\delta$  136.85, 136.15, 135.92, 135.85, 135.56, 135.47, 132.98, 130.96, 130.88, 130.38, 130.01, 129.83, 127.49, 127.37, 127.32, 127.26, 127.19, 127.11, 127.02, 126.98, 126.98, 126.88, 126.78, 122.81.

HRMS-ESI (+): Calculated for  $\text{C}_{24}\text{H}_{11}\text{ClNaS}$  [ $\text{M} + \text{Na}^+$ ] 389.01676; found 389.0162.

IR (film): 3458.5 (m), 3109.8 (w), 3031.7 (w), 1628.7 (m), 1420.3 (w), 1247.6 (m), 1023.2 (m), 910.0 (w), 847.7 (w), 834.4 (s), 819.7 (m), 733.3 (m), 693.8 (w), 680.4 (w).

## 2.2 Synthesis of compound 3

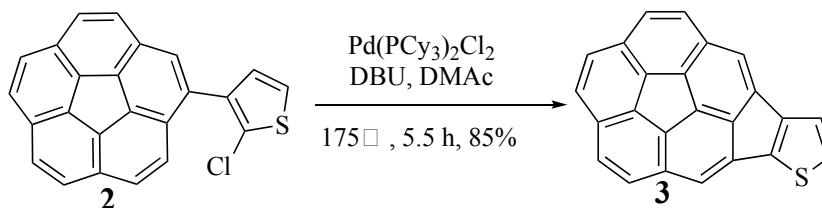

A dry, sealed tube containing a magnetic stirring bar was charged with **2** (9.5 mg 0.026 mmol, 1 eq),  $\text{Pd}(\text{PCy}_3)_2\text{Cl}_2$  (3.9 mg, 0.00538 mmol, 0.2 eq), DBU (0.024 mL, 0.156 mmol, 6 eq) and dimethylacetamide (1 mL). The reaction vessel was sealed, evacuated, purged with nitrogen and heated at  $175^\circ\text{C}$  for 5.5 hours. The reaction mixture was allowed to cool and was then diluted with 10 mL of dichloromethane. The organic solution was washed with 10% HCl, water, and brine and was then dried over anhydrous  $\text{Na}_2\text{SO}_4$  and concentrated under reduced pressure. The residue was subjected to silica gel flash column chromatography to give **3** (7.5 mg, 85%).

$^1\text{H}$  NMR (400 MHz, Chloroform-*d*)  $\delta$  7.54 – 7.47 (m, 4H), 7.41 (s, 2H), 7.36 (s, 1H), 7.32 (s, 1H), 7.15 (d,  $J = 4.9$  Hz, 1H), 7.11 (d,  $J = 5.0$  Hz, 1H).

$^{13}\text{C}$  NMR (101 MHz, Chloroform-*d*)  $\delta$  147.04, 145.16, 141.25, 139.15, 138.18, 138.16, 138.07, 137.49, 137.09, 137.03, 136.95, 136.87, 129.90, 129.82, 128.60, 128.13, 128.01, 127.12, 127.08, 126.80, 126.76, 121.66, 121.53, 119.91.

HRMS-ESI (+): Calculated for  $\text{C}_{24}\text{H}_{11}\text{S}$  [ $\text{M}+\text{H}^+$ ] 331.0576; found 331.0576.

IR (film): 3744.0 (m), 3091.1 (w), 3032.1 (w), 2378.0 (m), 2311.0 (m), 1750.8 (s), 1698.9 (m), 1641.9 (w), 1512.1 (w), 1321.2 (m), 1297.9 (m), 1127.2 (w), 1082.4 (w), 866.5 (s), 817.7 (s), 668.5 (m), 629.8 (m), 564.5 (m).

## 2.3 Synthesis of compound 5

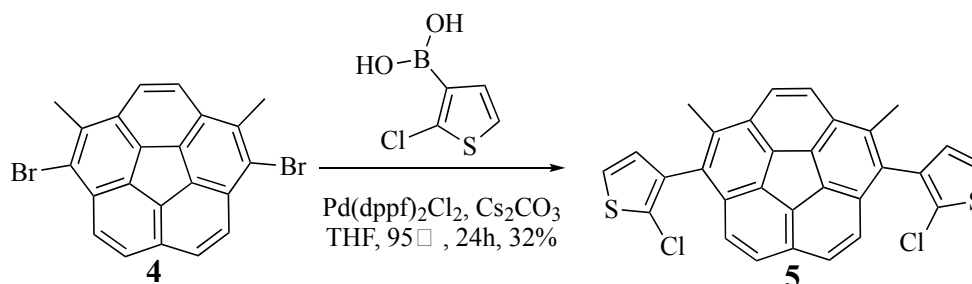

Compound **4** (100 mg, 0.23 mmol, 1 eq),  $\text{Pd}(\text{dppf})_2\text{Cl}_2$  (34 mg, 0.046 mmol, 0.2 eq),  $\text{Cs}_2\text{CO}_3$  (900 mg, 2.76 mmol, 12 eq), and (2-chlorothiophen-3-yl)boronic acid (150 mg,

0.92 mmol, 4 eq) was transferred into a sealed tube. Dry and degassed THF (23 mL) was added and the mixture was heated to 95 °C for 24 hours. After TLC trace showed complete consumption of 4, the reaction mixture was quenched with water (25 mL) and extracted with CH<sub>2</sub>Cl<sub>2</sub> (3 × 25 mL). The organic phase was dried over anhydrous Na<sub>2</sub>SO<sub>4</sub> and concentrated via rotary evaporator. The crude product was purified through column and recrystallized in CH<sub>2</sub>Cl<sub>2</sub>/ CH<sub>3</sub>OH to afford the pure 5 as white powder (38 mg, 32% yield).

<sup>1</sup>H NMR (400 MHz, Chloroform-*d*) δ 8.02 (s, 2H), 7.68 (d, *J* = 8.8 Hz, 2H), 7.33 (dd, *J* = 8.8, 2.5 Hz, 2H), 7.29 (dd, *J* = 5.9, 0 Hz, 2H), 6.97 (dd, *J* = 34.4, 4.4 Hz, 2H), 2.68 (s, 6H).

<sup>13</sup>C NMR (101 MHz, Chloroform-*d*) δ 136.25, 136.22, 135.73, 135.20, 135.18, 134.66, 134.48, 131.01, 130.00, 130.79, 130.29, 129.97, 129.80, 129.77, 127.84, 127.78, 127.28, 127.26, 126.01, 125.31, 122.68, 122.62, 15.90. [This compound exists as a mixture of rotamers, the rate of interconversion is slow on the NMR timescale at room temperature.]

HRMS-ESI (+): Calculated for C<sub>30</sub>H<sub>17</sub>Cl<sub>2</sub>S<sub>2</sub> [M+H<sup>+</sup>] 513.0114; found 513.0112.

IR (film): 3865.1 (w), 3108.3 (m), 2919.2 (s), 1451.2 (m), 1422.1 (m), 1403.9 (m), 1030.3 (s), 868.0 (s), 825.1 (w), 808.7 (s), 798.8 (s), 700.1 (m), 633.3 (s).

## 2.4 Synthesis of compound 6

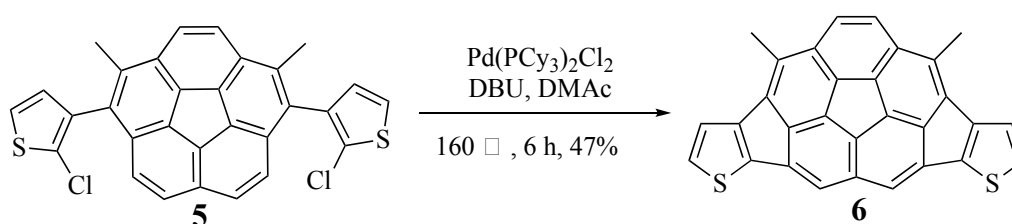

Compound 5 (20 mg, 0.039 mmol, 1 eq) was reacted with 1,8-diazabicyclo[5.4.0]-7-undecene (0.08 mL, 0.546 mmol, 14 eq) and Pd(PCy<sub>3</sub>)<sub>2</sub>Cl<sub>2</sub> (12 mg, 0.0156 mmol, 0.4 eq) in dry N,N-dimethylacetamide (2 mL). The reaction mixture was degassed with nitrogen gas and heated to 160 °C in a sealed tube for 5-6 hours. After TLC trace showed complete consumption of 5, the mixture was diluted with CH<sub>2</sub>Cl<sub>2</sub> (20 mL) and washed with H<sub>2</sub>O (3 × 40 mL). 2 M HCl was added dropwise to neutralize the aqueous phase while washing. The organic phase was dried over Na<sub>2</sub>SO<sub>4</sub> and concentrated via rotary evaporator. The crude product was then purified through column using 10:1

hexane/ CH<sub>2</sub>Cl<sub>2</sub> followed by 5:1 hexane/ CH<sub>2</sub>Cl<sub>2</sub> as eluent. It was then recrystallized with CH<sub>2</sub>Cl<sub>2</sub>/CH<sub>3</sub>OH to afford the 8 mg pure 6 as orange solid (47% yield).

<sup>1</sup>H NMR (600 MHz,) δ 7.55 (s, 2H), 7.24 (d, *J* = 4.9 Hz, 2H), 7.20 (s, 2H), 7.19 (d, *J* = 5.2 Hz, 2H), 2.57 (s, 6H).

<sup>13</sup>C NMR (151 MHz,) δ 144.20, 142.96, 141.73, 140.52, 138.39, 138.39, 136.48, 136.33, 134.73, 133.99, 132.53, 128.61, 125.19, 122.64, 121.04, 15.05.

HRMS-ESI (+): Calculated for C<sub>30</sub>H<sub>15</sub>S<sub>2</sub> [M+H<sup>+</sup>] 439.0610; found 439.0607.

IR (film): 3437.2 (m), 2926.3 (s), 2848.8 (m), 1635.4 (w), 1445.1 (w), 1174.0 (w), 1003.9 (w), 735.7 (w).

## 2.5 Synthesis of compound 8

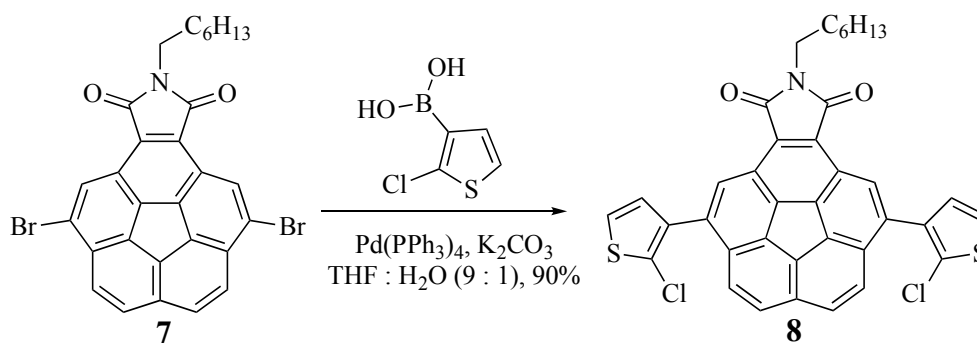

Compound 7 (110 mg, 0.191 mmol, 1 eq), Pd(PPh<sub>3</sub>)<sub>4</sub> (24 mg, 0.02 mmol, 0.1 eq), K<sub>2</sub>CO<sub>3</sub> (133 mg, 0.96 mmol, 5 eq), and (2-chlorothiophen-3-yl)boronic acid (128 mg, 0.788 mmol, 4 eq) was transferred into a sealed tube. Dry and degassed 5mL THF: H<sub>2</sub>O (9:1) was added and the mixture was heated to 100 °C for 1 hour. After TLC trace showed complete consumption of 7, the reaction mixture was quenched with water (25 mL) and extracted with CH<sub>2</sub>Cl<sub>2</sub> (3 × 25 mL). The organic phase was dried over anhydrous Na<sub>2</sub>SO<sub>4</sub> and concentrated via rotary evaporator. The crude product was purified through column to afford the pure 8 as yellow solid (112 mg, 90% yield).

<sup>1</sup>H NMR (400 MHz, Chloroform-*d*) δ 8.51 (s, 2H), 7.83 (d, *J* = 8.8 Hz, 2H), 7.71 (d, *J* = 8.8 Hz, 2H), 7.30 (d, *J* = 5.7 Hz, 2H), 7.19 (d, *J* = 5.7 Hz, 2H), 3.76 (t, *J* = 7.3 Hz, 2H), 1.77 – 1.69 (m, 2H), 1.41 – 1.32 (m, 4H), 1.30 – 1.24 (m, 4H), 0.87 (t, *J* = 6.9 Hz, 3H).

<sup>13</sup>C NMR (101 MHz, Chloroform-*d*) δ 169.28, 138.00, 135.99, 135.89, 135.62, 135.60, 131.73, 131.11, 130.93, 129.76, 128.83, 127.59, 127.59, 125.85, 124.72, 123.23, 37.97, 31.70, 28.85, 28.82, 26.87, 22.56, 14.05.



HRMS-ESI (+): Calculated for  $C_{37}H_{25}Cl_2NNaO_2S_2$   $[M+Na^+]$  672.0598; found 672.0596.

IR (film): 2926.4 (m), 2854.6 (m), 1760.5 (m), 1703.0 (s), 1436.3 (m), 1399.1 (m), 1369.2 (w), 1072.7 (w), 1027.5 (m), 881.1 (w), 845.2 (w), 827.8(w), 728.9 (w).

## 2.6 Synthesis of compound 9

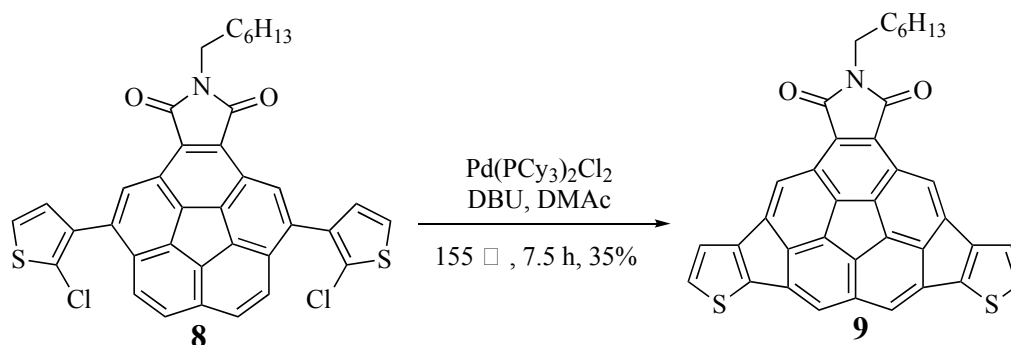

A dry, sealed tube containing a magnetic stirring bar was charged with 8 (20 mg 0.0308 mmol, 1 eq),  $Pd(PCy_3)_2Cl_2$  (9.1 mg, 0.123 mmol, 0.4 eq), DBU (0.028 mL, 0.185 mmol, 6 eq) and dimethylacetamide (2 mL). The reaction vessel was sealed, evacuated, purged with nitrogen and heated at 155 °C for 7.5 hours. The reaction mixture was allowed to cool and was then diluted with 20 mL of dichloromethane. The organic solution was washed with 10% HCl, water, and brine and was then dried over anhydrous  $Na_2SO_4$  and concentrated under reduced pressure. The residue was subjected to silica gel flash column chromatography to give 9 (6.2 mg, 35%).

$^1H$  NMR (400 MHz, Chloroform-*d*)  $\delta$  7.70 (s, 2H), 7.18 (d,  $J$  = 5.0 Hz, 2H), 7.09 (d,  $J$  = 4.9 Hz, 2H), 6.98 (s, 2H), 3.61 (t,  $J$  = 7.3 Hz, 2H), 1.65 – 1.60 (m, 2H), 1.29 (d,  $J$  = 6.7 Hz, 8H), 0.85 (t,  $J$  = 7.0 Hz, 3H).

$^{13}C$  NMR (101 MHz, Chloroform-*d*)  $\delta$  168.66, 144.47, 143.56, 142.29, 142.17, 139.96, 139.02, 138.30, 137.27, 137.10, 131.77, 129.31, 129.08, 123.57, 120.48, 119.41, 37.74, 31.68, 28.84, 28.78, 26.84, 22.57, 14.04.

HRMS-ESI (+): Calculated for  $C_{37}H_{24}NO_2S_2$   $[M+H^+]$  579.1277; found 579.1281

IR (film): 3438.8 (m), 2924.8 (s), 2853.1 (m), 1756.9 (m), 1698.7 (s), 1438.8 (w), 1397.4 (m), 1364.3 (w), 1296.6 (w), 1081.7 (m), 884.1 (m), 755.2 (w), 699.0 (w).

## 2.7 Synthesis of compound 11

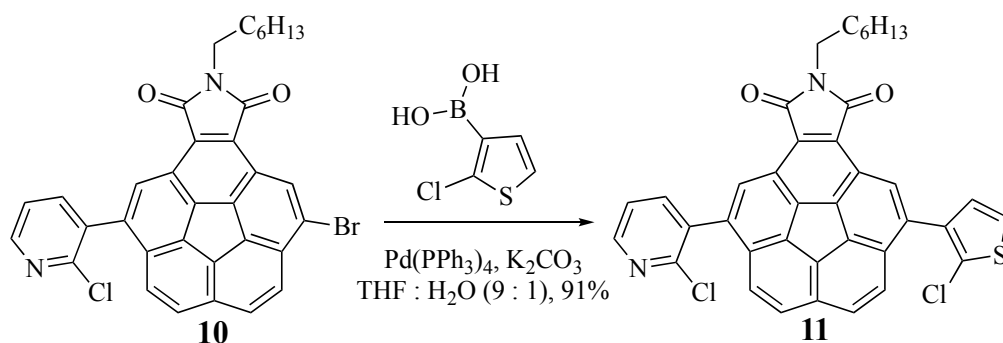

Compound 10 (159 mg, 0.262 mmol, 1 eq),  $\text{Pd(PPh}_3)_4$  (30 mg, 0.0262 mmol, 0.1 eq),  $\text{K}_2\text{CO}_3$  (180 mg, 1.30 mmol, 5 eq), and (2-chlorothiophen-3-yl)boronic acid (84 mg, 0.524 mmol, 2 eq) was transferred into a sealed tube. Dry and degassed 2 mL  $\text{THF} : \text{H}_2\text{O} (9:1)$  was added and the mixture was heated to 100 °C for 1 hour. After TLC trace showed complete consumption of 10, the reaction mixture was quenched with water (25 mL) and extracted with  $\text{CH}_2\text{Cl}_2$  ( $3 \times 25$  mL). The organic phase was dried over anhydrous  $\text{Na}_2\text{SO}_4$  and concentrated via rotary evaporator. The crude product was purified through column to afford the pure 11 as yellow solid (154 mg, 91% yield).

$^1\text{H}$  NMR (600 MHz,  $\text{CHCl}_3$ )  $\delta$  8.58 (dd,  $J = 4.8, 1.9$  Hz, 1H), 8.52 (s, 1H), 8.39 (s, 1H), 7.82 (t,  $J = 8.6$  Hz, 2H), 7.76 (dd,  $J = 7.5, 2.0$  Hz, 1H), 7.72 (d,  $J = 8.8$  Hz, 1H), 7.49 (d,  $J = 8.8$  Hz, 1H), 7.42 (dd,  $J = 7.5, 4.8$  Hz, 1H), 7.30 (d,  $J = 5.6$  Hz, 1H), 7.20 (d,  $J = 5.7$  Hz, 1H), 3.75 (t,  $J = 7.3$  Hz, 2H), 1.76-1.71 (m, 2H), 1.40 – 1.34 (m, 4H), 1.31 – 1.27 (m, 4H), 0.87 (t,  $J = 6.8$  Hz, 3H).

$^{13}\text{C}$  NMR (151 MHz,  $\text{CHCl}_3$ )  $\delta$  169.26, 169.17, 150.80, 149.61, 140.70, 138.99, 138.44, 138.18, 135.91, 135.89, 135.72, 135.21, 134.21, 131.87, 131.80, 131.25, 130.97, 130.94, 129.73, 129.73, 129.05, 128.91, 127.73, 127.68, 126.66, 126.45, 125.92, 125.02, 124.56, 123.30, 122.57, 38.00, 31.68, 28.83, 28.80, 26.85, 22.54, 14.02.

HRMS-ESI (+): Calculated for  $\text{C}_{38}\text{H}_{26}\text{Cl}_2\text{N}_2\text{O}_2\text{Na}$   $[\text{M}+\text{Na}^+]$  667.0977; found 667.098.

IR (film): 2924.6 (s), 2853.5 (m), 1758.6 (m), 1705.4 (s), 1457.0 (w), 1436.2 (m), 1399.6 (s), 1371.0 (m), 1028.8 (m), 885.7 (m), 841.0 (w), 826.3 (m).

## 2.8 Synthesis of compound 12

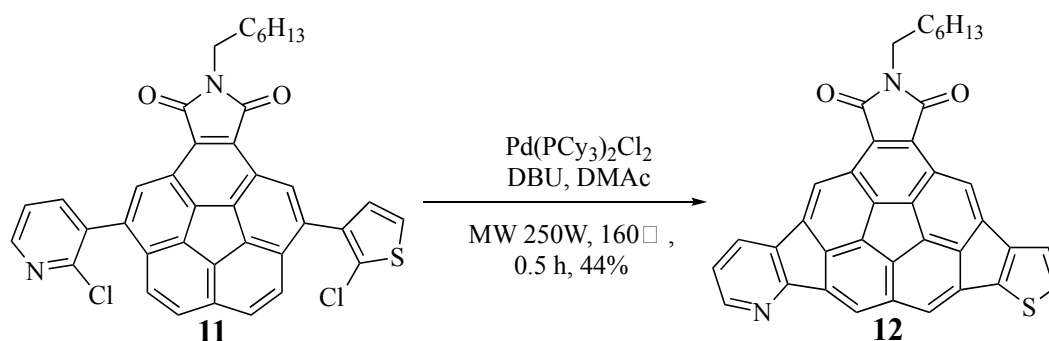

A dry, sealable microwave reaction vessel containing a Teflon coated magnetic stirring bar was charged with **11** (12 mg 0.0186 mmol, 1 eq),  $\text{Pd}(\text{PCy}_3)_2\text{Cl}_2$ , (4.1 mg, 0.00555 mmol, 0.4 eq), DBU (0.017ml, 0.112 mmol, 6 eq) and dimethylacetamide (2.2 ml). The reaction vessel was sealed, evacuated, purged with nitrogen and heated in a CEM Discovery microwave reactor at 150 °C for 30 min. The reaction mixture was allowed to cool and was then diluted with 20 mL of dichloromethane. The organic solution was washed with 10% HCl, water, and brine and was then dried over anhydrous  $\text{Na}_2\text{SO}_4$  and concentrated under reduced pressure. The residue was subjected to silica gel flash column chromatography to give **12** (4.7 mg, 44%).

$^1\text{H}$  NMR (400 MHz, Chloroform-*d*)  $\delta$  8.40 (dd,  $J = 5.0, 1.6$  Hz, 1H), 8.09 (s, 1H), 7.90 (dd,  $J = 7.7, 1.5$  Hz, 1H), 7.85 (s, 1H), 7.79 (s, 1H), 7.23 (s, 1H), 7.20 (d,  $J = 5.0$  Hz, 1H), 7.14 (dd,  $J = 7.6, 5.2$  Hz, 1H), 7.11 (d,  $J = 5.2$  Hz, 1H), 7.12 – 7.10 (m, 1H), 3.65 (t,  $J = 7.3$  Hz, 2H), 1.64 (t,  $J = 7.3$  Hz, 2H), 1.26 (s, 8H), 0.87 – 0.83 (m, 3H).

$^{13}\text{C}$  NMR (101 MHz, Chloroform-*d*)  $\delta$  168.45, 168.41, 158.43, 148.91, 144.75, 144.66, 142.04, 141.34, 140.38, 139.49, 139.24, 139.03, 138.94, 138.75, 137.42, 137.11, 133.44, 131.78, 131.68, 129.69, 129.69, 129.42, 129.42, 129.37, 128.89, 125.74, 123.98, 122.51, 121.01, 120.55, 119.71, 37.84, 31.70, 28.84, 28.79, 26.86, 22.58, 14.04.

HRMS-ESI (+): Calculated for  $\text{C}_{38}\text{H}_{25}\text{N}_2\text{O}_2\text{S}$   $[\text{M}+\text{H}^+]$  573.1632; found 573.1601.

IR (film): 3439.3 (s), 2923.3 (s), 2852.7 (m), 1756.7 (w), 1697.6 (s), 1555.1 (w), 1438.1 (m), 1397.9 (s), 1371.6 (m), 1119.8 (w), 1083.8 (w), 886.1 (m), 803.3 (m), 722.5 (w), 541.9 (m).

### 3. Cyclic voltammetric measurements

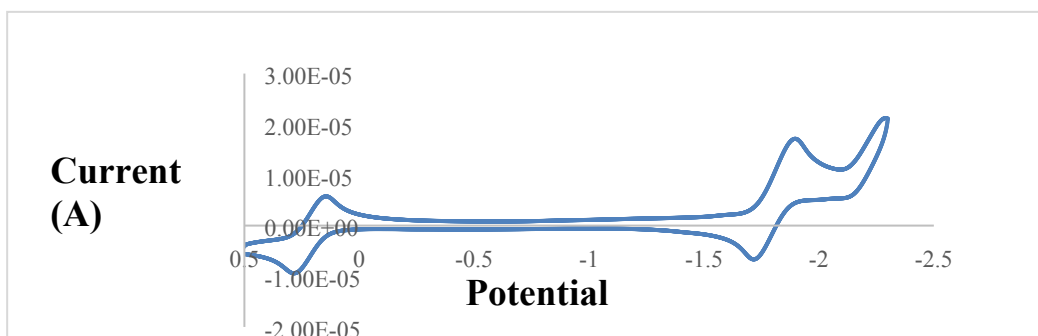

Figure S1: Reduction CV plot for 3.

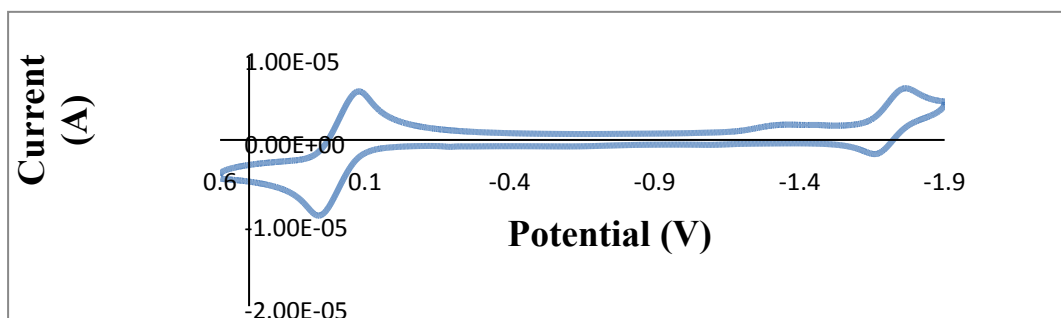

Figure S2: Reduction CV plot for 6.

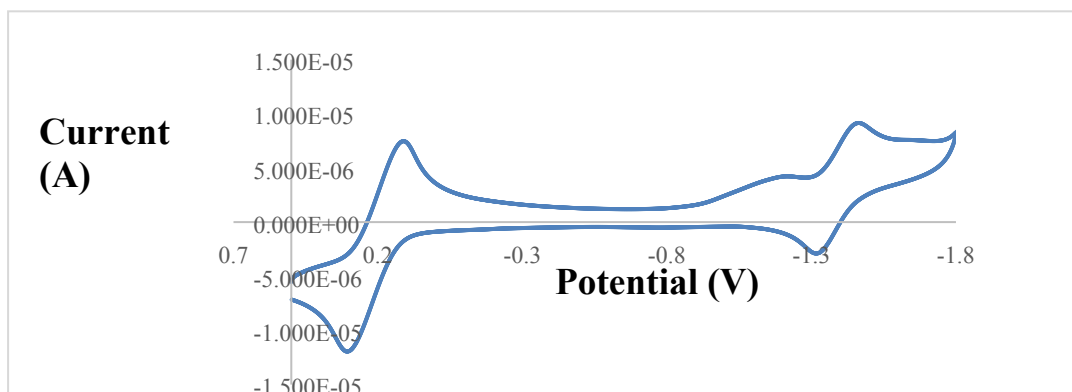

Figure S3: Reduction CV plot for 9.

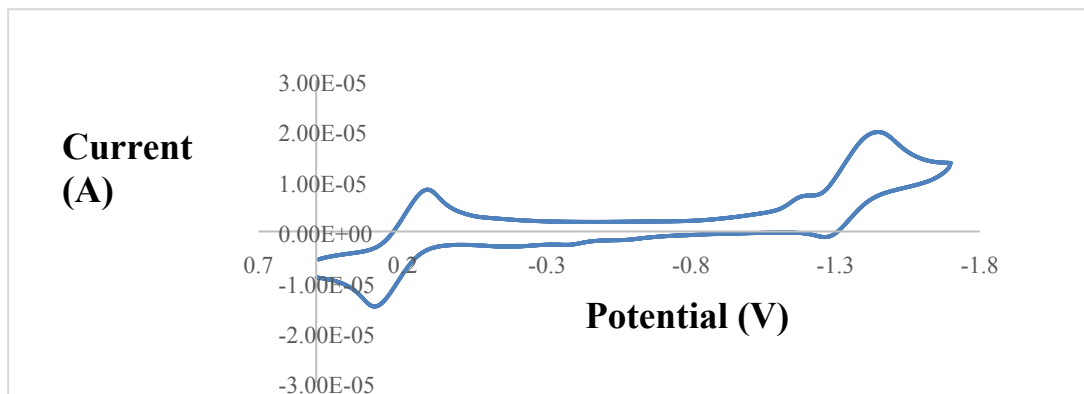

Figure S4: Reduction CV plot for 12.

## 4. Enantiomeric separation of 3a/3b

### 4.1 Analytical HPLC separation for the enantiomers 3a/3b

- The sample is dissolved in dichloromethane, injected on the chiral columns, and detected with an UV detector at 254 nm and with dichroism circular at 254 nm. The flow-rate is 1 ml/min.

| Column       | Mobile Phase             | t1       | k1   | t2       | k2   | $\alpha$ | Rs   |
|--------------|--------------------------|----------|------|----------|------|----------|------|
| Chiralpak IG | Heptane / ethanol (95/5) | 6.95 (-) | 1.36 | 7.43 (+) | 1.52 | 1.12     | 1.72 |

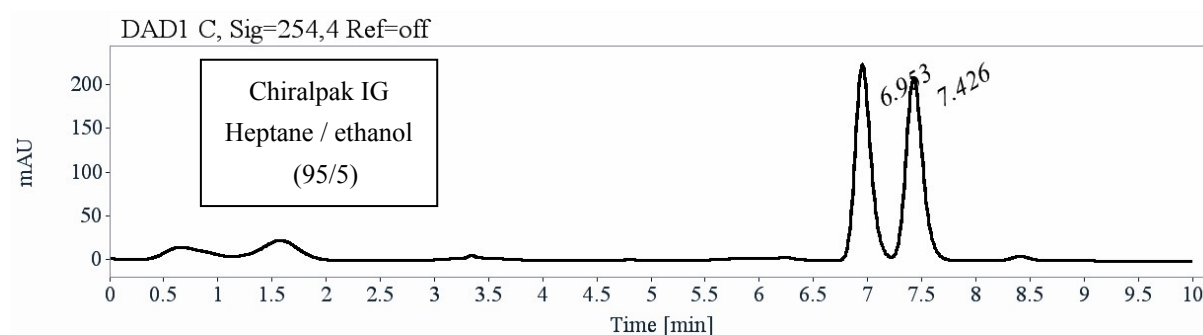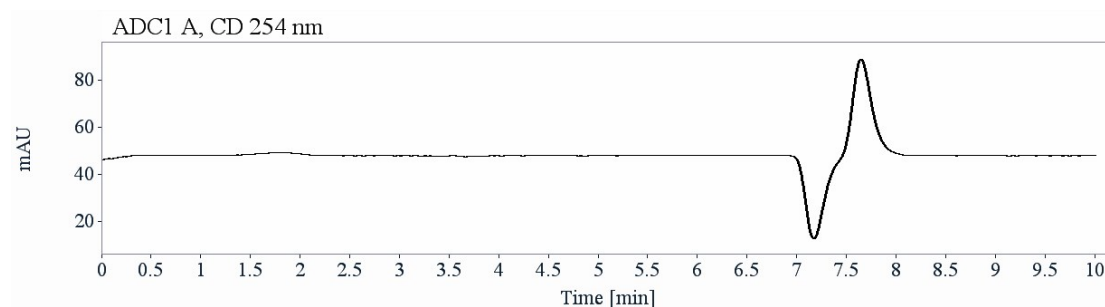

| RT [min] | Area | Area%  | Capacity Factor | Enantioselectivity | Resolution (USP) |
|----------|------|--------|-----------------|--------------------|------------------|
| 6.95     | 2275 | 49.86  | 1.36            |                    |                  |
| 7.43     | 2288 | 50.14  | 1.52            | 1.12               | 1.72             |
| Sum      | 4562 | 100.00 |                 |                    |                  |

### 4.2 Semi-preparative separation of enantiomers 3a/3b

- Sample preparation: About 43 mg of compound **3a/3b** are dissolved in 28 mL of a mixture of dichloromethane and hexane (36/64).
- Chromatographic conditions: Chiralpak IG (250 x 10 mm), hexane / ethanol (95/5) as mobile phase, flow-rate = 5 mL/min, UV detection at 290 nm.
- Injections (stacked): 560 times 0.05ml, every 1.5minutes.
- First fraction(**3a**): 17 mg of the first eluted enantiomer with ee > 99.5%

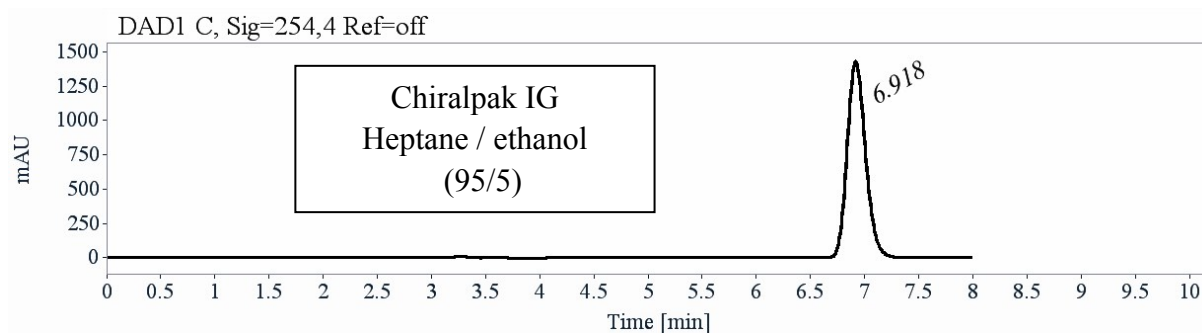

| RT [min] | Area  | Area%  |
|----------|-------|--------|
| 6.92     | 15030 | 100.00 |
| Sum      | 15030 | 100.00 |

- Second fraction(**3b**): 16 mg of the second eluted enantiomer with ee > 99 %

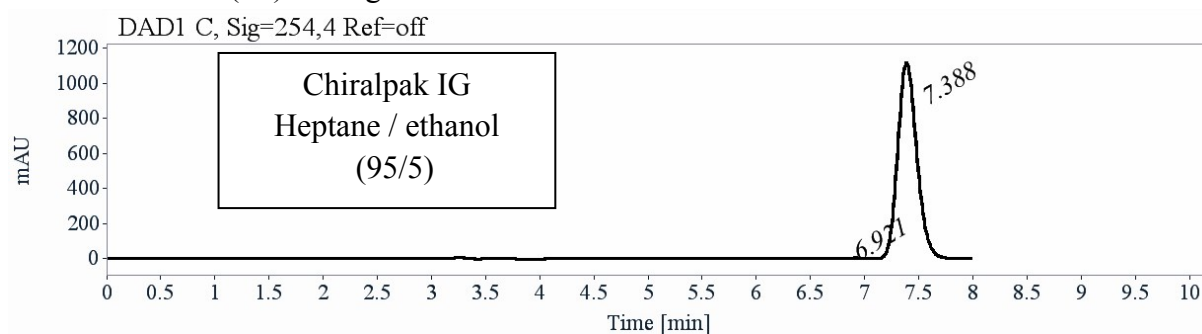

| RT [min] | Area  | Area%  |
|----------|-------|--------|
| 6.92     | 53    | 0.38   |
| 7.39     | 13702 | 99.62  |
| Sum      | 13754 | 100.00 |

## 5. Enantiomeric separation of 12a/12b

### 5.1 Analytical HPLC separation of the enantiomers 12a/12b

• A sample of **12a/12b** is dissolved in dichloromethane, injected on the Chiralpak ID column, and detected with an UV detector at 288 nm. Mobile Phase is DCM: iPrOH: Hexane (15:15:70). The flow-rate is 1 ml/min.

Chromatogram:

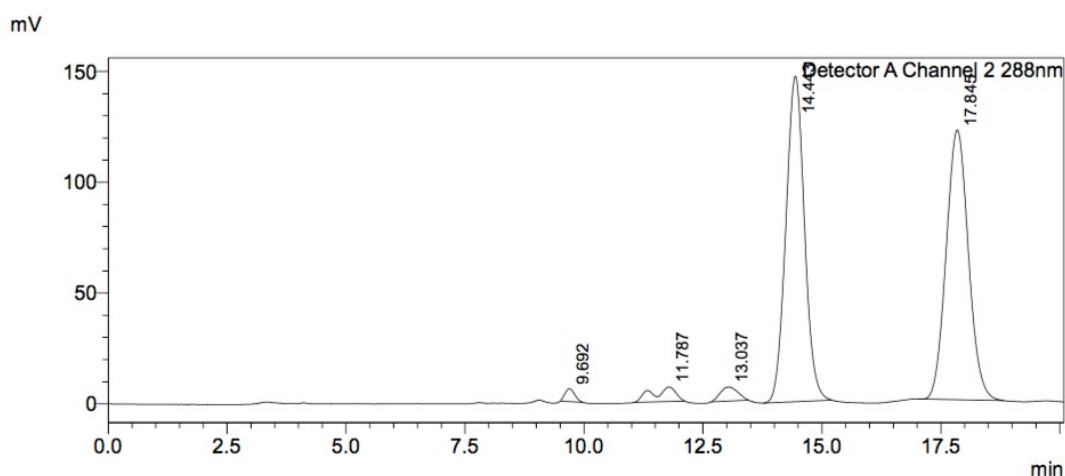

Peak Table:

Detector A Channel 2 288nm

| Peak  | Ret. Time | Area    | Height | Area%   | Compound Name |
|-------|-----------|---------|--------|---------|---------------|
| 1     | 9.692     | 82917   | 5782   | 0.986   |               |
| 2     | 11.787    | 218339  | 6551   | 2.596   |               |
| 3     | 13.037    | 162315  | 6336   | 1.930   |               |
| 4     | 14.443    | 3988269 | 146837 | 47.425  |               |
| 5     | 17.845    | 3957807 | 121658 | 47.063  |               |
| Total |           | 8409647 | 287164 | 100.000 |               |

**Figure S5:** Analytical HPLC trace of **12a/12b**.

### 5.2 Semi-preparative separation of enantiomers 12a/12b

- Sample preparation: About 40 mg of compound **12a/12b** are dissolved in 12 mL of dichloromethane.
- Chromatographic conditions: Chiralpak ID (250 x 10 mm), hexane / iPrOH / dichloromethane (70/15/15) as mobile phase, flow-rate = 5 mL/min, UV detection at 288 nm.
- Injections (stacked): 20 times, 0.6ml
- First fraction(**12a**): 16 mg of the first eluted with ee > 99.5%

- Second fraction(**12b**): 17 mg of the second eluted with ee >99.5%
- Chromatograms of the collected fractions:

Chromatogram:

mV

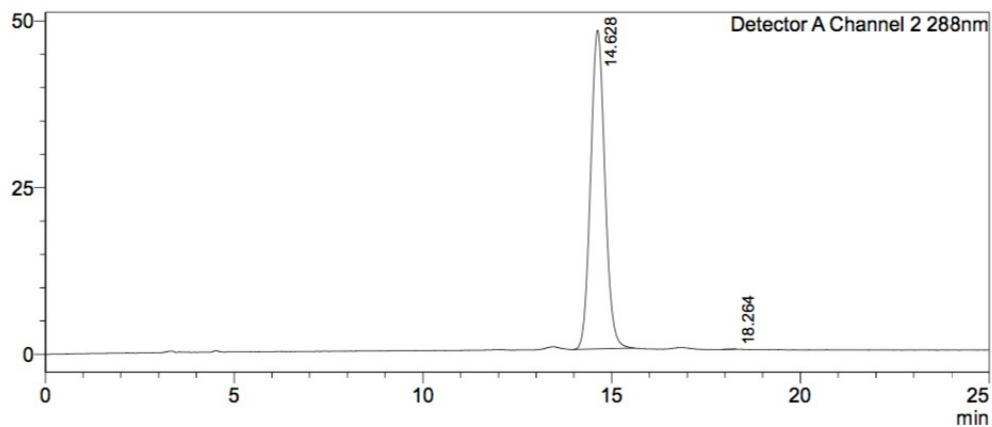

Peak Table:

Detector A Channel 2 288nm

| Peak  | Ret. Time | Area    | Height | Area%   | Compound Name |
|-------|-----------|---------|--------|---------|---------------|
| 1     | 14.628    | 1254428 | 47788  | 99.986  |               |
| 2     | 18.264    | 172     | 11     | 0.014   |               |
| Total |           | 1254600 | 47800  | 100.000 |               |

**Figure S6:** HPLC trace of **12a** (after semi-preparative separation).

Chromatogram:

mV

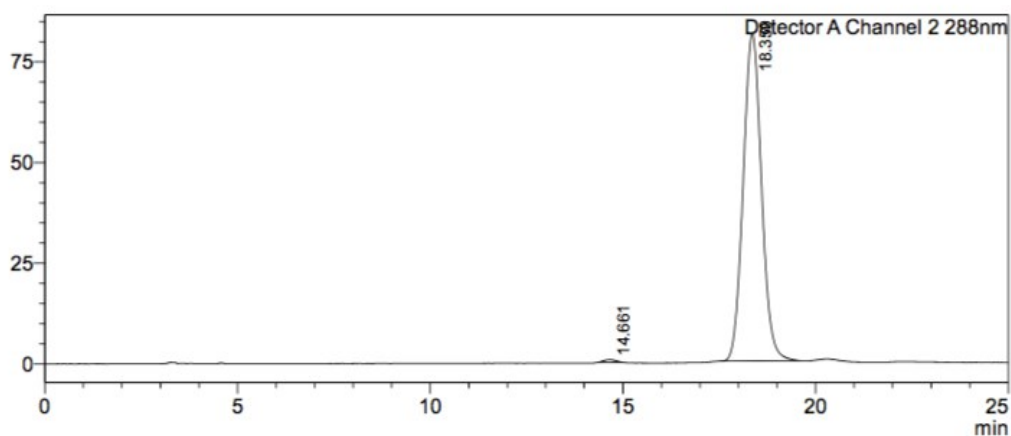

Peak Table:

Detector A Channel 2 288nm

| Peak  | Ret. Time | Area    | Height | Area%   | Compound Name |
|-------|-----------|---------|--------|---------|---------------|
| 1     | 14.661    | 12701   | 620    | 0.471   |               |
| 2     | 18.359    | 2686071 | 81295  | 99.529  |               |
| Total |           | 2698771 | 81915  | 100.000 |               |

**Figure S7:** HPLC trae of the **12b** (after semi-preparative separation).



## 6. Optical rotations

Optical rotations were measured on a 241 Perkin-Elmer polarimeter with a sodium lamp (589 nm), a mercury lamp (578 and 546 nm) and a double-jacketed 10 cm cell at 25°C.

**Table S1.**  $[\alpha]_D^{25}$  of **3a** and **3b** at different wavelength in CH<sub>2</sub>Cl<sub>2</sub>

| $\lambda$<br>(nm) | first eluted ( <b>3a</b> ) on Chiralpak IG<br>$[\alpha]_D^{25}$ (CH <sub>2</sub> Cl <sub>2</sub> ) | second eluted ( <b>3b</b> ) on Chiralpak IG<br>$[\alpha]_D^{25}$ (CH <sub>2</sub> Cl <sub>2</sub> ) |
|-------------------|----------------------------------------------------------------------------------------------------|-----------------------------------------------------------------------------------------------------|
| 589               | - 1150 (c = 0.037)                                                                                 | + 1150 (c = 0.039)                                                                                  |
| 578               | - 1300 (c = 0.037)                                                                                 | + 1300 (c = 0.039)                                                                                  |
| 546               | - 2600 (c = 0.037)                                                                                 | + 2600 (c = 0.039)                                                                                  |

## 7. Kinetic studies of enantiomerization

About 0.35 mg of the 2<sup>nd</sup> eluted enantiomer **3b** is heated in about 20 mL of ethanol at 78°C. 0.02ml are taken and then injected on Chiralpak IG (95:5, heptane / ethanol, 1 mL/min, UV 254 nm). The percentage decrease of the 2<sup>nd</sup> eluted enantiomer (**3b**) is monitored.

**Table S2.** Percentage of **3b** at different time in ethanol.

| Time<br>(min) | % 2 <sup>nd</sup> eluted enantiomer ( <b>3b</b> ) | $\ln ((\%t-50\%)/(\%(t=0)-50\%))$ |
|---------------|---------------------------------------------------|-----------------------------------|
| 0             | 97.13                                             | 0.0000                            |
| 20            | 90.55                                             | -0.1504                           |
| 41            | 84.50                                             | -0.3120                           |
| 55            | 80.94                                             | -0.4209                           |
| 75            | 76.49                                             | -0.5761                           |
| 95            | 72.68                                             | -0.7314                           |

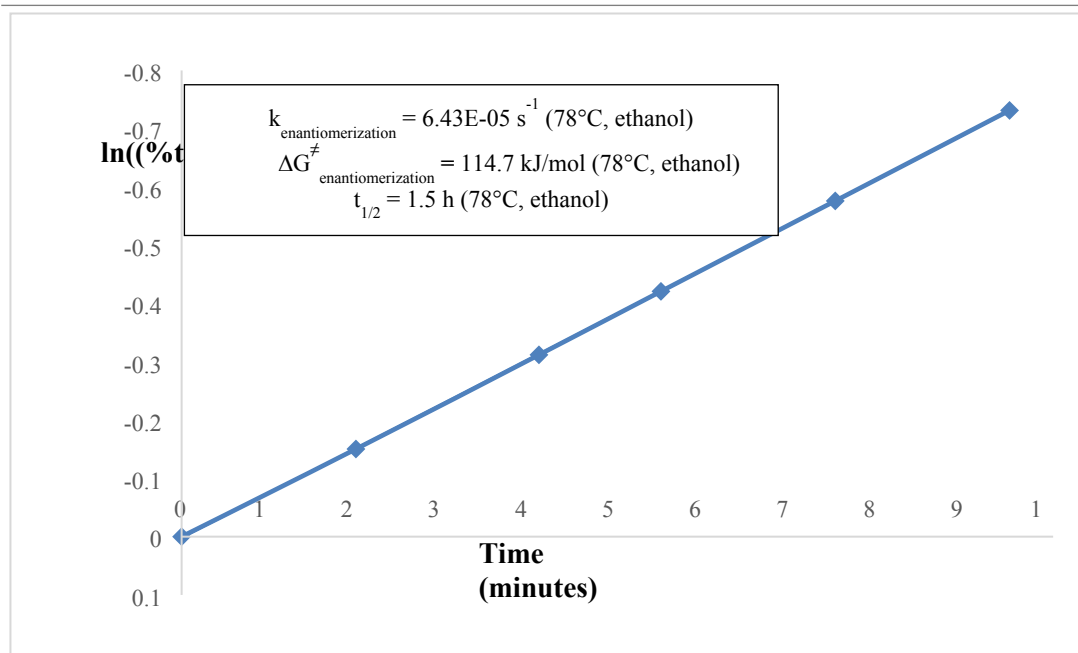

**Figure S8.** Kinetics of **3b** enantiomerization in ethanol at 78°C

About 0.3 mg of the 2<sup>nd</sup> eluted enantiomer (**3b**) is heated in about 20 mL of cyclohexane at 80.7°C. 0.02ml are taken and then injected on Chiralpak IG (95:5, heptane / ethanol, 1 mL/min, UV 254 nm). The percentage decrease of the 2<sup>nd</sup> eluted enantiomer (**3b**) is monitored.

**Table S3.** Percentage of **3b** at different time in cyclohexane.

| Time (min) | % 2 <sup>nd</sup> eluted enantiomer ( <b>3b</b> ) | ln ((%t-50%)/(%(t=0)-50%)) |
|------------|---------------------------------------------------|----------------------------|
| 0          | 99.02                                             | 0.0000                     |
| 10         | 96.86                                             | -0.0451                    |
| 15         | 95.84                                             | -0.0671                    |
| 20         | 94.87                                             | -0.0885                    |
| 30         | 92.96                                             | -0.1320                    |
| 40         | 91.11                                             | -0.1760                    |
| 50         | 89.33                                             | -0.2202                    |
| 60         | 87.69                                             | -0.2628                    |
| 80         | 84.57                                             | -0.3492                    |
| 100        | 81.64                                             | -0.4378                    |
| 120        | 79.04                                             | -0.5236                    |
| 140        | 76.61                                             | -0.6109                    |
| 160        | 74.39                                             | -0.6981                    |

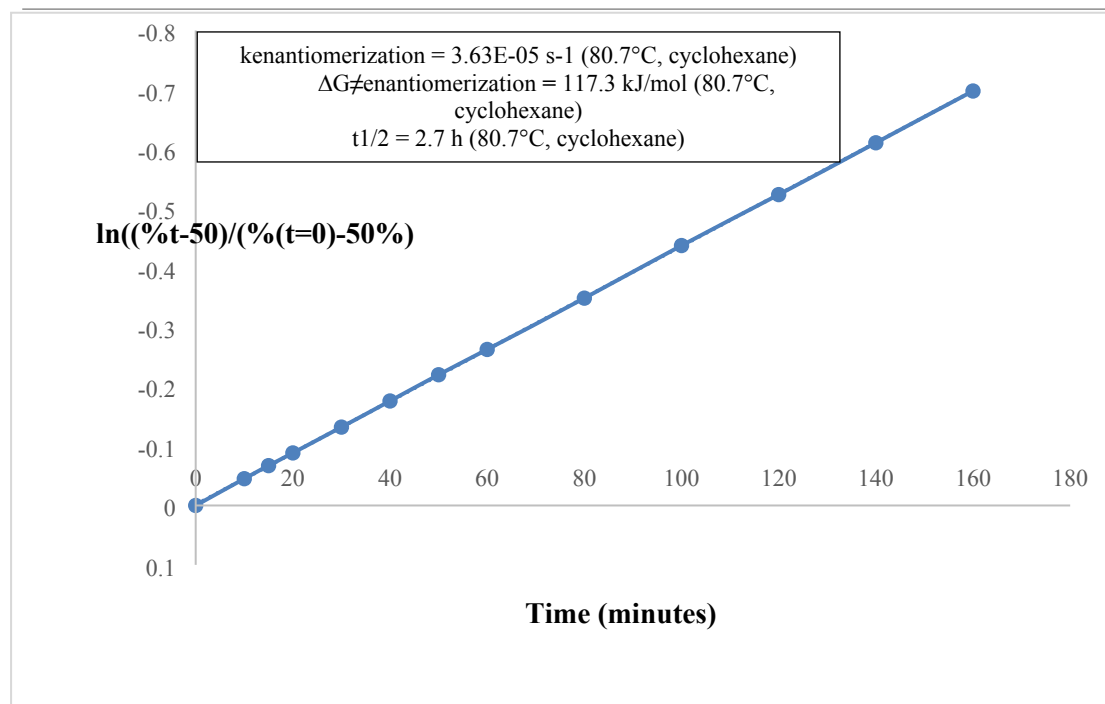

**Figure S9.** Kinetics of **3b** enantiomerization in cyclohexane at 80.7°C

About 0.25 mg of the 2<sup>nd</sup> eluted enantiomer **3b** is heated in about 15 mL of CCl<sub>4</sub> at 77 °C. 0.02 ml are taken and then injected on Chiralpak IG (95:5 heptane / ethanol, 1 mL/min, UV 254 nm). The percentage decrease of the 2<sup>nd</sup> eluted enantiomer **3b** is monitored.

**Table S4.** Percentage of **3b** at different time in CCl<sub>4</sub>.

| Time (min) | % 2 <sup>nd</sup> eluted enantiomer ( <b>3b</b> ) | ln ((%t-50%)/(%(t=0)-50%)) |
|------------|---------------------------------------------------|----------------------------|
| 0          | 99.21                                             | 0.0000                     |
| 5          | 98.14                                             | -0.0220                    |
| 10         | 97.09                                             | -0.0440                    |
| 15         | 96.05                                             | -0.0664                    |
| 20         | 95.05                                             | -0.0883                    |
| 30         | 93.07                                             | -0.1333                    |
| 45         | 90.30                                             | -0.1997                    |
| 60         | 87.66                                             | -0.2675                    |
| 75         | 85.22                                             | -0.3345                    |
| 95         | 82.20                                             | -0.4241                    |
| 115        | 79.44                                             | -0.5137                    |
| 135        | 74.92                                             | -0.6032                    |
| 155        | 74.63                                             | -0.6921                    |

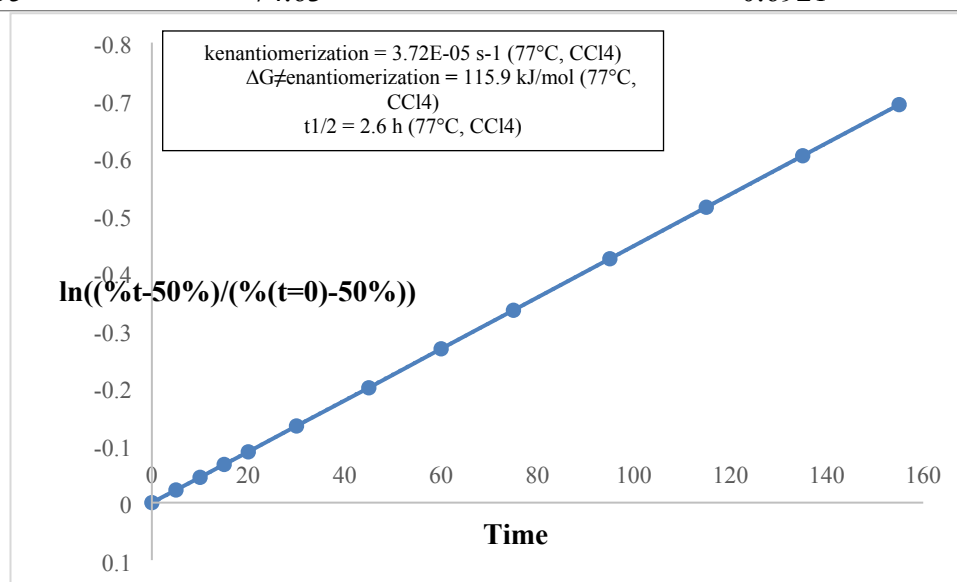**Figure S10.** Kinetics of **3b** enantiomerization in CCl<sub>4</sub> at 77°C

About 0.3 mg of the 2<sup>nd</sup> eluted enantiomer **12b** is heated in about 15 mL of diphenyl ether at 228 °C. 0.02 ml is taken and then injected on Chiralpak ID, hexane / iPrOH / dichloromethane (70/15/15). The percentage decrease of the 2<sup>nd</sup> eluted enantiomer **12b** is monitored.

**Table S5.** Percentage of **12b** at different time in diphenyl ether

| Time (h) | % 2 <sup>nd</sup> eluted enantiomer ( <b>12b</b> ) | ln (1/(1-2X)) |
|----------|----------------------------------------------------|---------------|
| 0        | 99.53                                              | 0.009444460   |
| 12       | 99.40                                              | 0.012072581   |
| 24       | 98.93                                              | 0.0216323     |
| 36       | 98.59                                              | 0.028605257   |

|     |       |             |
|-----|-------|-------------|
| 49  | 98.20 | 0.036663984 |
| 60  | 98.06 | 0.039572775 |
| 72  | 97.49 | 0.051503843 |
| 84  | 97.15 | 0.058688996 |
| 96  | 96.77 | 0.066781034 |
| 111 | 96.55 | 0.071496002 |
| 120 | 96.28 | 0.077313103 |

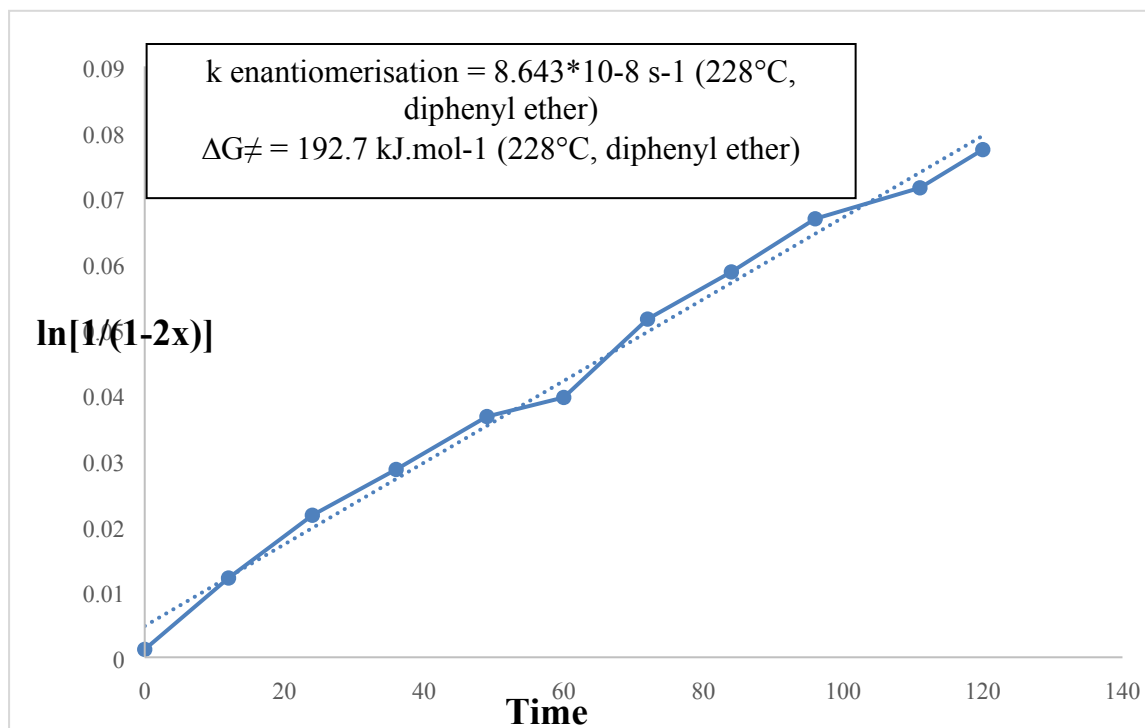

**Figure S11.** Kinetics of **12b** enantiomerization in diphenyl ether at 228°C

## 8. Electronic circular dichroism

ECD and UV spectra were measured on a JASCO J-815 spectrometer equipped with a JASCO Peltier cell holder PTC-423 to maintain the temperature at  $25.0 \pm 0.2^\circ\text{C}$ . A CD quartz cell of 1 mm of optical pathlength was used. The CD spectrometer was purged with nitrogen before recording each spectrum, which was baseline subtracted.

The baseline was always measured for the same solvent and in the same cell as the samples.

The spectra are presented without smoothing and further data processing.

Acquisition parameters: 0.1 nm as intervals, scanning speed 50 nm/min, band width 2 nm, and 3 accumulations per sample.

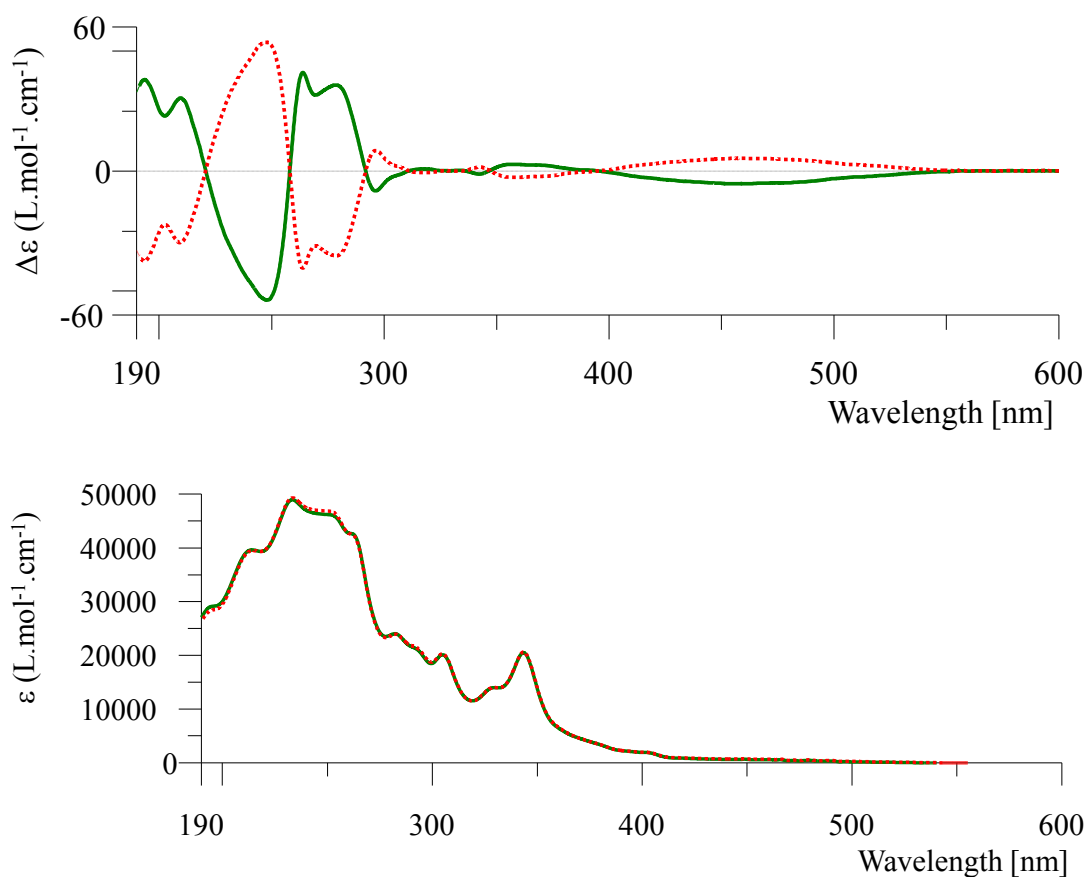

**Figure S12.** ECD and UV-vis of **3a** and **3b** in ACN (1<sup>st</sup> eluted enantiomer(**3a**): green solid line, concentration = 0.335 mmol.L<sup>-1</sup> in acetonitrile. 2<sup>nd</sup> eluted enantiomer(**3b**): red dotted line, concentration = 0.333 mmol.L<sup>-1</sup> in acetonitrile).

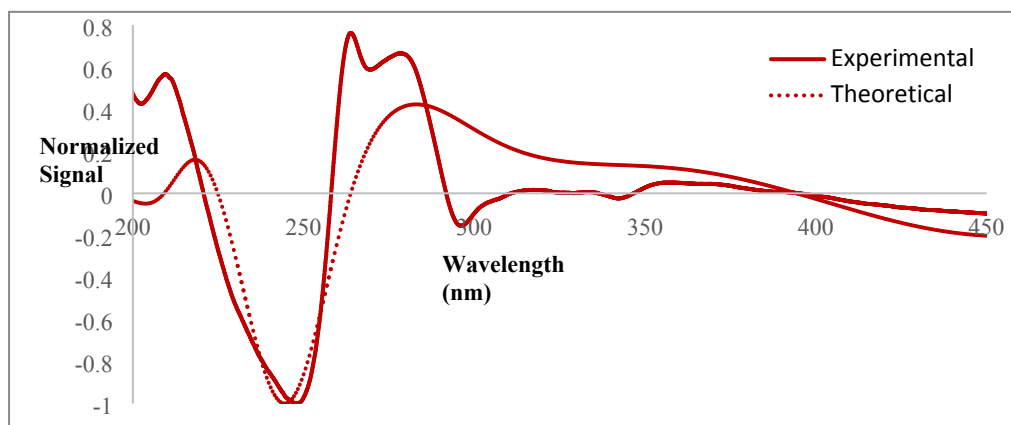

**Figure S13.** Experimental (1<sup>st</sup> eluted) and TD-CAMB3LYP/Def2-TZVP//B97-D/Def2-TZVPP ECD spectra of **3**.

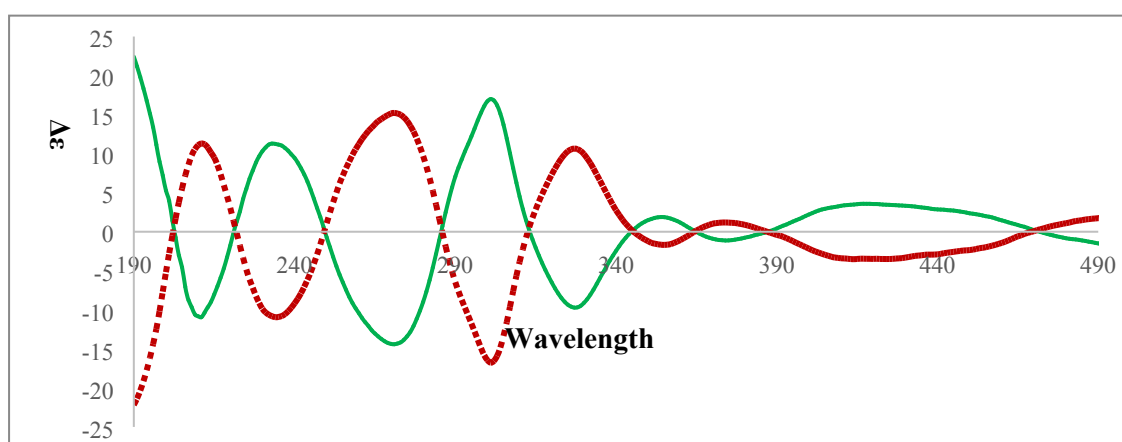

**Figure S14.** ECD spectra of **12a** and **12b** (1<sup>st</sup> eluted enantiomer: green solid line. 2<sup>nd</sup> eluted enantiomer: red dotted line).

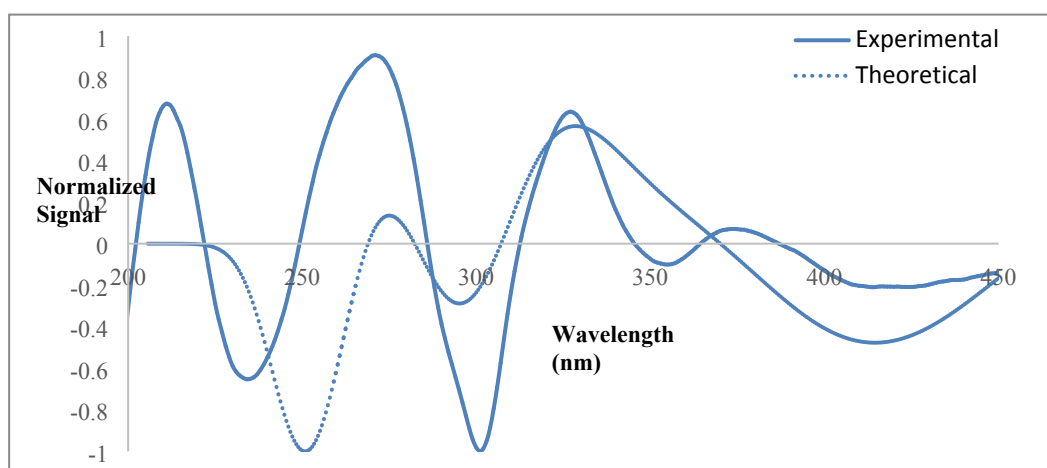

**Figure S15.** Experimental (2<sup>nd</sup> eluted) and TD-CAMB3LYP/Def2-TZVP//B97-D/Def2-TZVPP ECD spectra of **12**.

## 9. Vibrational circular dichroism

The VCD spectra were measured on the BioTools Chiral IR-2X (Dual PEM) with 300  $\mu\text{m}$  cell,  $\text{CHBr}_3$  as solvent.

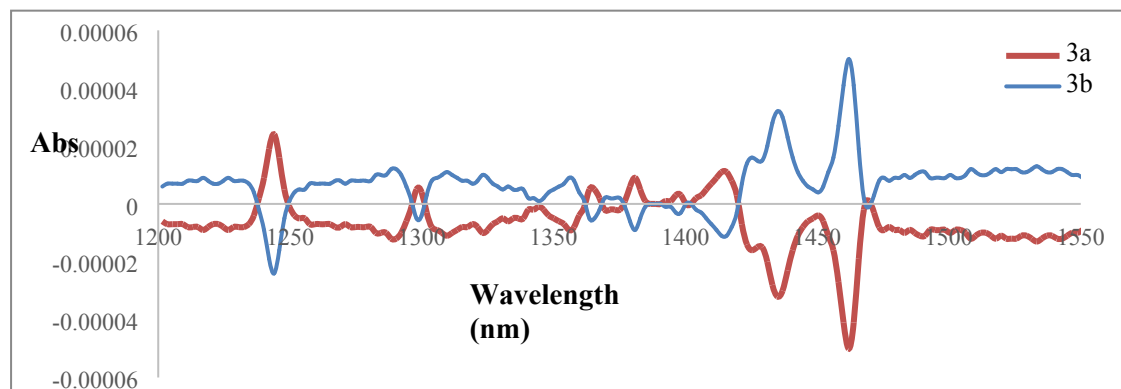

**Figure S16.** VCD spectra of 3a/3b

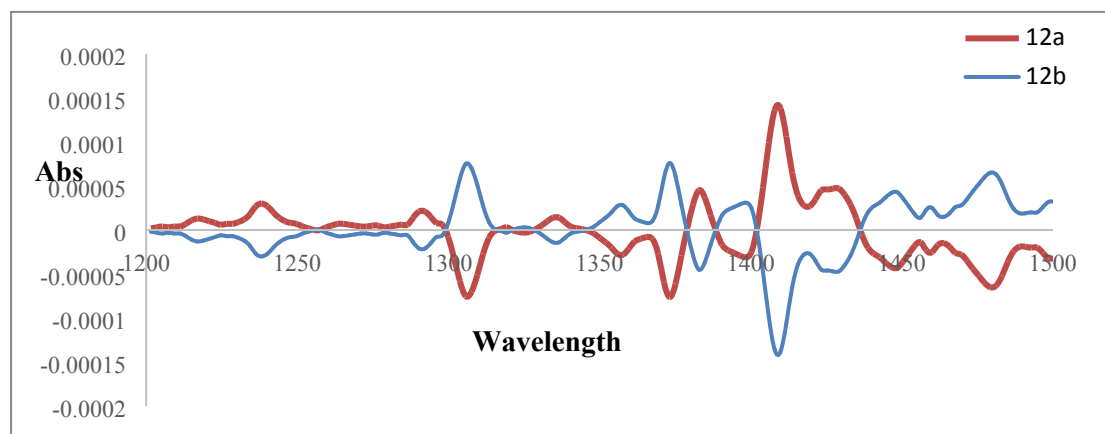

**Figure S17.** VCD spectra of 12a/12b

## 10. X-ray crystal structure

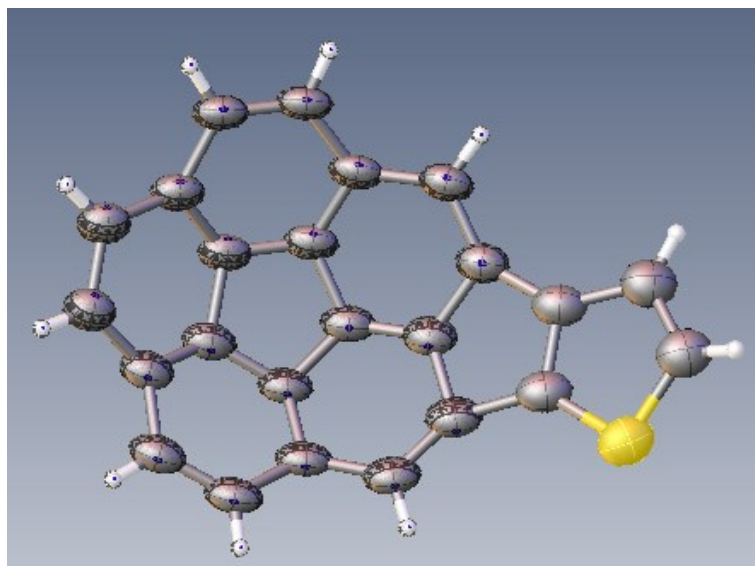

**Figure S18.** Crystal structure of mono thiophene-indenocorannulene **3**

**Table 4-9.** Crystal data of mono thiophene-indenocorannulene **3**

|                                        |                                                             |
|----------------------------------------|-------------------------------------------------------------|
| Identification code                    | <b>3</b>                                                    |
| Empirical formula                      | C <sub>24</sub> H <sub>10</sub> S                           |
| Formula weight                         | 330.38                                                      |
| Temperature/K                          | 293(2)                                                      |
| Crystal system                         | orthorhombic                                                |
| Space group                            | <i>Pna</i> 2 <sub>1</sub>                                   |
| <i>a</i> /Å                            | 23.621(3)                                                   |
| <i>b</i> /Å                            | 16.2578(9)                                                  |
| <i>c</i> /Å                            | 3.8910(3)                                                   |
| $\alpha$ /°                            | 90                                                          |
| $\beta$ /°                             | 90                                                          |
| $\gamma$ /°                            | 90                                                          |
| Volume/Å <sup>3</sup>                  | 1494.2(2)                                                   |
| <i>Z</i>                               | 4                                                           |
| $\rho_{\text{calc}}$ /cm <sup>3</sup>  | 1.469                                                       |
| $\mu$ /mm <sup>-1</sup>                | 1.910                                                       |
| <i>F</i> (000)                         | 680.0                                                       |
| Crystal size/mm <sup>3</sup>           | 0.02 × 0.05 × 0.10                                          |
| Radiation                              | CuK $\alpha$ ( $\lambda$ = 1.54184)                         |
| 2 $\theta$ range for data collection/° | 9.256 to 133.766                                            |
| Index ranges                           | -28 ≤ <i>h</i> ≤ 27, -19 ≤ <i>k</i> ≤ 19, -4 ≤ <i>l</i> ≤ 4 |
| Reflections collected                  | 3485                                                        |



|                                                |                                                             |
|------------------------------------------------|-------------------------------------------------------------|
| Independent reflections                        | 3485 [ $R_{\text{int}} = ?$ , $R_{\text{sigma}} = 0.0147$ ] |
| Data/restraints/parameters                     | 3485/4964/345                                               |
| Goodness-of-fit on $F^2$                       | 1.229                                                       |
| Final R indexes [ $I \geq 2\sigma(I)$ ]        | $R_1 = 0.0895$ , $wR_2 = 0.2712$                            |
| Final R indexes [all data]                     | $R_1 = 0.1030$ , $wR_2 = 0.2863$                            |
| Largest diff. peak/hole / $e \text{ \AA}^{-3}$ | 0.28/-0.26                                                  |
| Flack parameter                                | 0.45(10)                                                    |

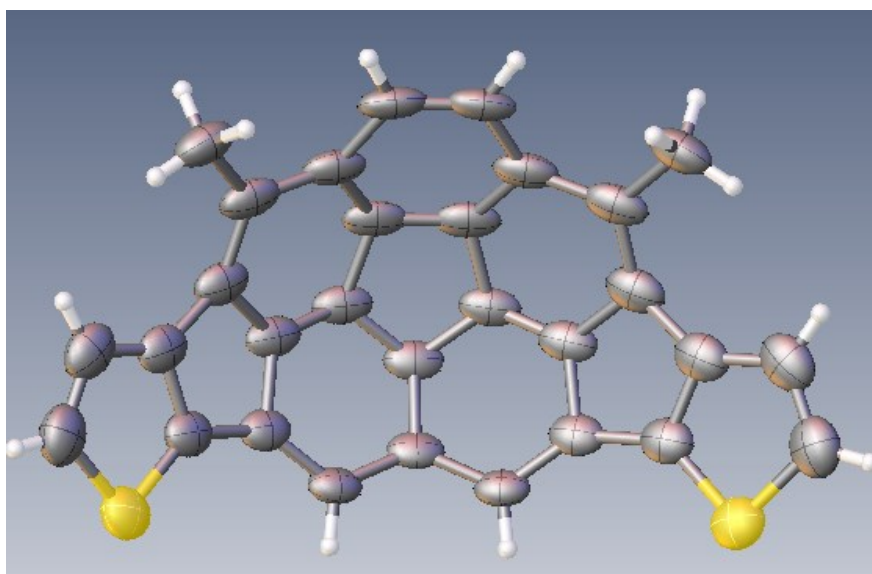

**Figure S19.** Crystal structure of dimethyl thiophene-diindenocorannulene **6**

**Table 4-10.** Crystal data of dimethyl thiophene-diindenocorannulene **6**

|                                       |                                        |
|---------------------------------------|----------------------------------------|
| Identification code                   | <b>6</b>                               |
| Empirical formula                     | $\text{C}_{30}\text{H}_{14}\text{S}_2$ |
| Formula weight                        | 438.58                                 |
| Temperature/K                         | 159.99(10)                             |
| Crystal system                        | orthorhombic                           |
| Space group                           | <i>Pnma</i>                            |
| $a/\text{\AA}$                        | 8.06299(16)                            |
| $b/\text{\AA}$                        | 24.9602(6)                             |
| $c/\text{\AA}$                        | 9.47610(18)                            |
| $\alpha/^\circ$                       | 90                                     |
| $\beta/^\circ$                        | 90                                     |
| $\gamma/^\circ$                       | 90                                     |
| Volume/ $\text{\AA}^3$                | 1907.10(7)                             |
| $Z$                                   | 4                                      |
| $\rho_{\text{calc}}/\text{g cm}^{-3}$ | 1.5274                                 |

|                                                |                                                               |
|------------------------------------------------|---------------------------------------------------------------|
| $\mu/\text{mm}^{-1}$                           | 2.653                                                         |
| F(000)                                         | 908.9                                                         |
| Crystal size/ $\text{mm}^3$                    | $0.04 \times 0.03 \times 0.01$                                |
| Radiation                                      | Cu K $\alpha$ ( $\lambda = 1.54184$ )                         |
| 2 $\theta$ range for data collection/ $^\circ$ | 7.08 to 148.7                                                 |
| Index ranges                                   | $-10 \leq h \leq 9, -31 \leq k \leq 27, -6 \leq l \leq 11$    |
| Reflections collected                          | 9656                                                          |
| Independent reflections                        | 1926 [ $R_{\text{int}} = 0.0326, R_{\text{sigma}} = 0.0244$ ] |
| Data/restraints/parameters                     | 1926/0/149                                                    |
| Goodness-of-fit on $F^2$                       | 1.075                                                         |
| Final R indexes [ $I \geq 2\sigma(I)$ ]        | $R_1 = 0.0508, wR_2 = 0.1335$                                 |
| Final R indexes [all data]                     | $R_1 = 0.0601, wR_2 = 0.1411$                                 |
| Largest diff. peak/hole / $e \text{ \AA}^{-3}$ | 0.31/-0.36                                                    |

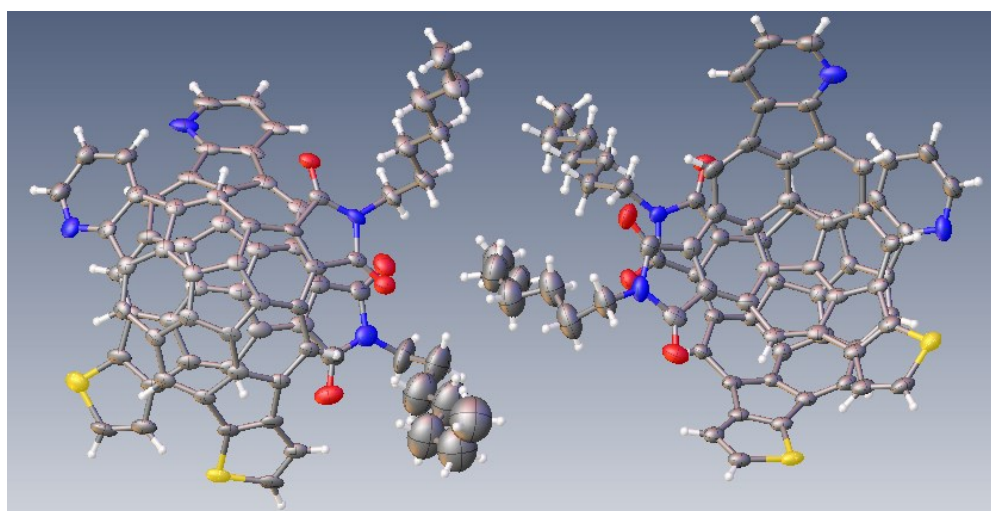

**Figure S20.** Crystal structure of **12a**

**Table 4-11.** Crystal data of **12a**

|                     |                                                          |
|---------------------|----------------------------------------------------------|
| Identification code | <b>12a</b>                                               |
| Empirical formula   | $\text{C}_{38}\text{H}_{24}\text{N}_2\text{O}_2\text{S}$ |
| Formula weight      | 572.65                                                   |
| Temperature/K       | 115.00(14)                                               |
| Crystal system      | monoclinic                                               |
| Space group         | $P2_1$                                                   |
| $a/\text{\AA}$      | 7.76820(10)                                              |
| $b/\text{\AA}$      | 24.6364(4)                                               |
| $c/\text{\AA}$      | 29.2589(5)                                               |
| $\alpha/^\circ$     | 90                                                       |
| $\beta/^\circ$      | 94.119(2)                                                |
| $\gamma/^\circ$     | 90                                                       |

|                                             |                                                                |
|---------------------------------------------|----------------------------------------------------------------|
| Volume/Å <sup>3</sup>                       | 5585.12(15)                                                    |
| Z                                           | 8                                                              |
| $\rho_{\text{calc}}/\text{g}/\text{cm}^3$   | 1.362                                                          |
| $\mu/\text{mm}^{-1}$                        | 1.340                                                          |
| F(000)                                      | 2384.0                                                         |
| Crystal size/mm <sup>3</sup>                | 0.09 × 0.06 × 0.03                                             |
| Radiation                                   | CuK $\alpha$ ( $\lambda$ = 1.54184)                            |
| 2 $\Theta$ range for data collection/°      | 4.694 to 133.202                                               |
| Index ranges                                | -9 ≤ h ≤ 9, -29 ≤ k ≤ 29, -34 ≤ l ≤ 34                         |
| Reflections collected                       | 94635                                                          |
| Independent reflections                     | 19718 [R <sub>int</sub> = 0.1337, R <sub>sigma</sub> = 0.0885] |
| Data/restraints/parameters                  | 19718/2854/1549                                                |
| Goodness-of-fit on F <sup>2</sup>           | 1.053                                                          |
| Final R indexes [I ≥ 2 $\sigma$ (I)]        | R <sub>1</sub> = 0.0889, wR <sub>2</sub> = 0.2530              |
| Final R indexes [all data]                  | R <sub>1</sub> = 0.1196, wR <sub>2</sub> = 0.2780              |
| Largest diff. peak/hole / e Å <sup>-3</sup> | 0.62/-0.44                                                     |
| Flack parameter                             | 0.06(4)                                                        |

## 11. $^1\text{H}$ -NMR and $^{13}\text{C}$ -NMR

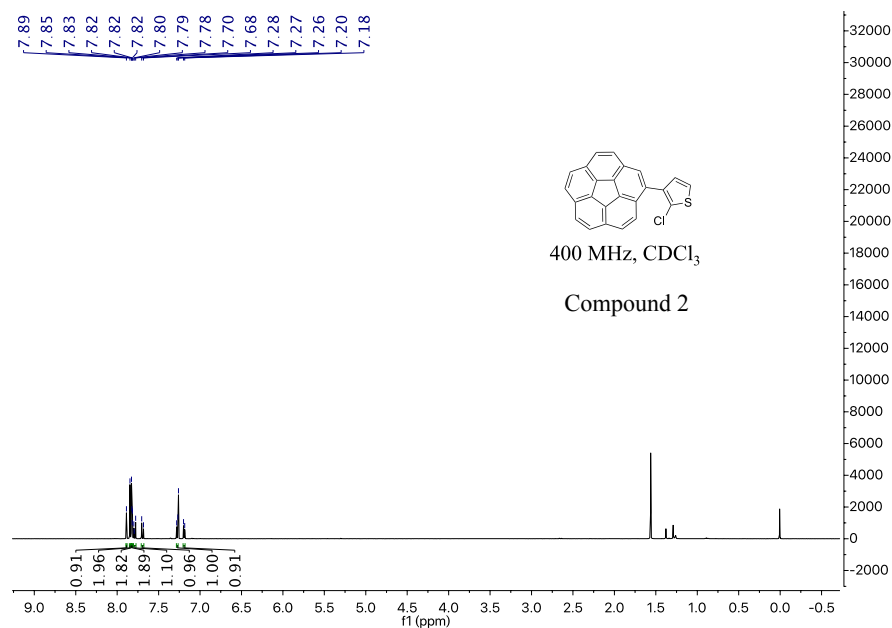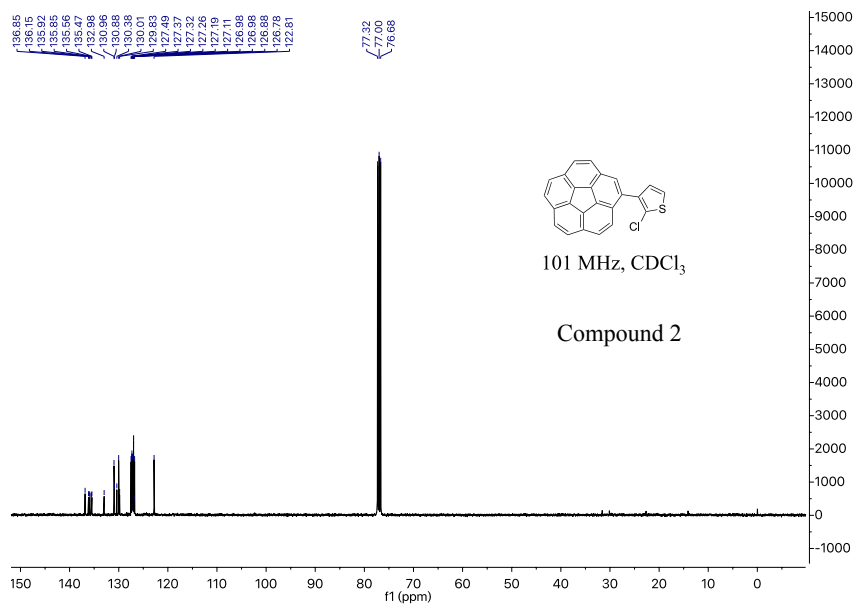

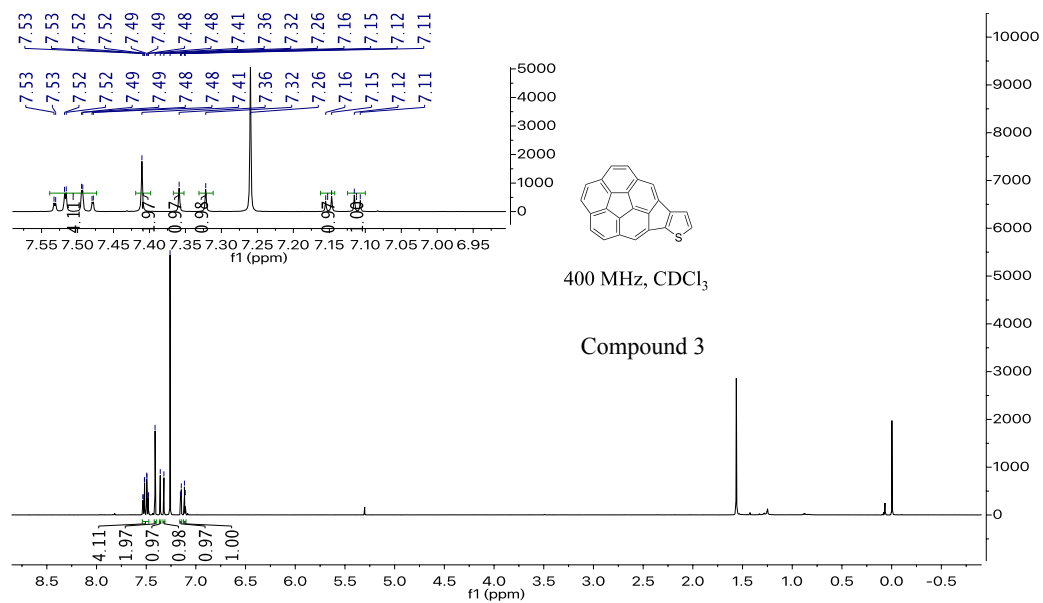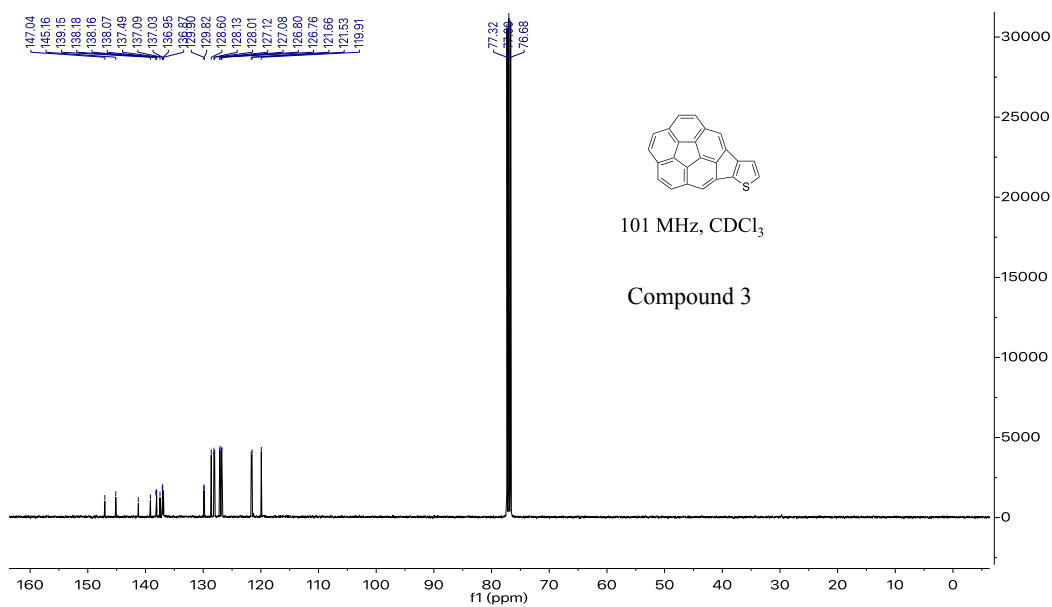



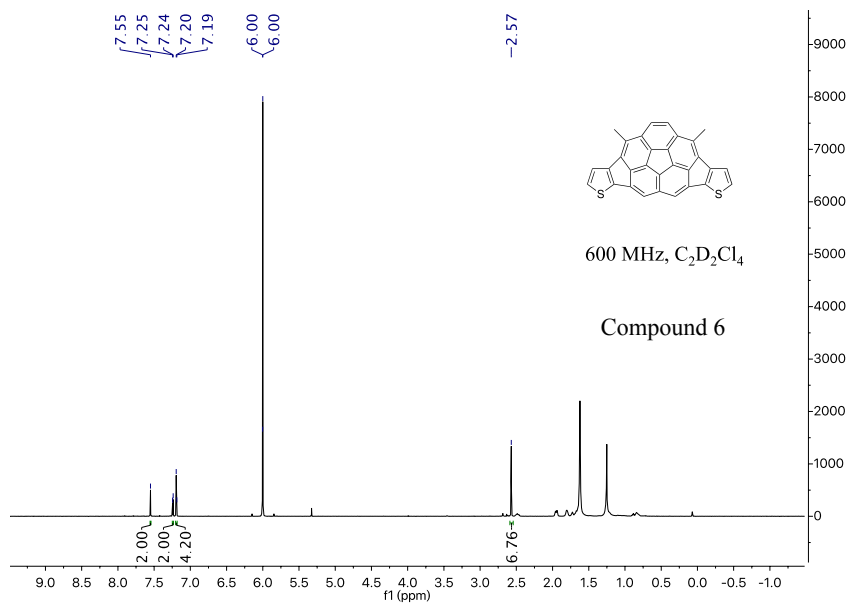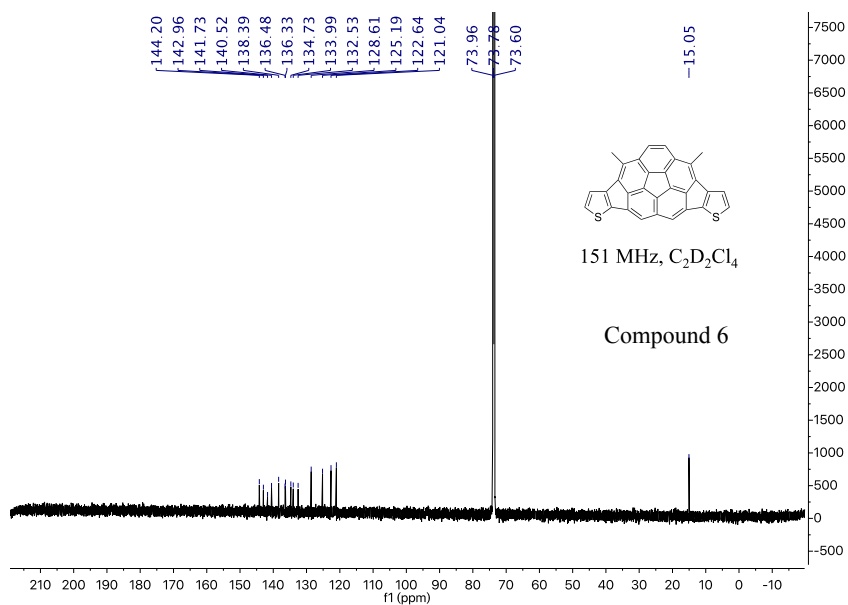

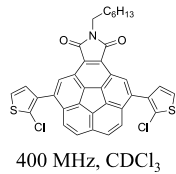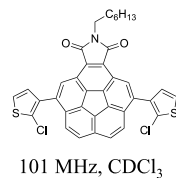



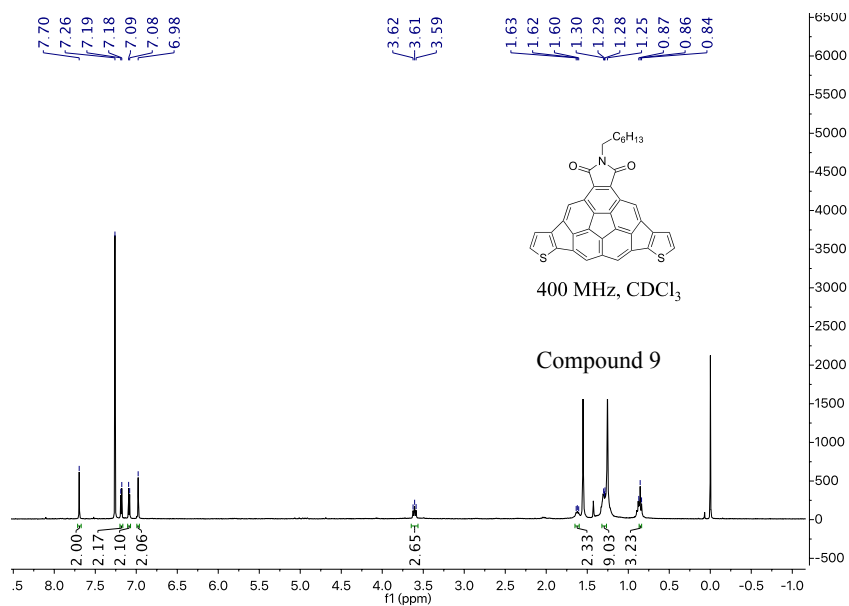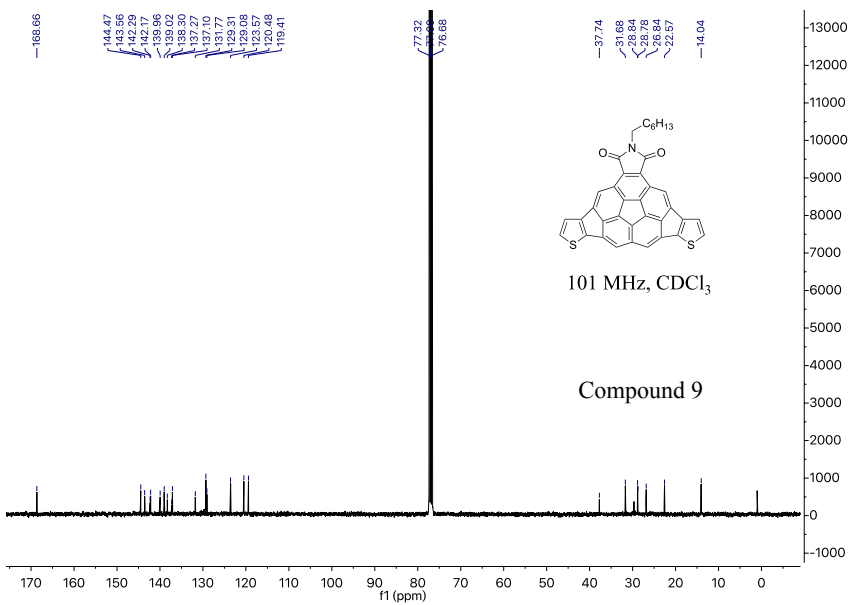

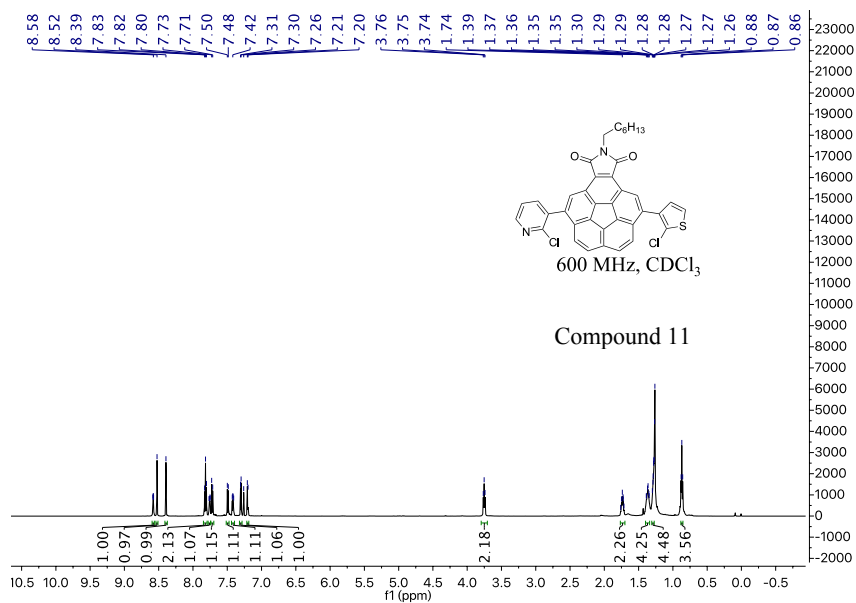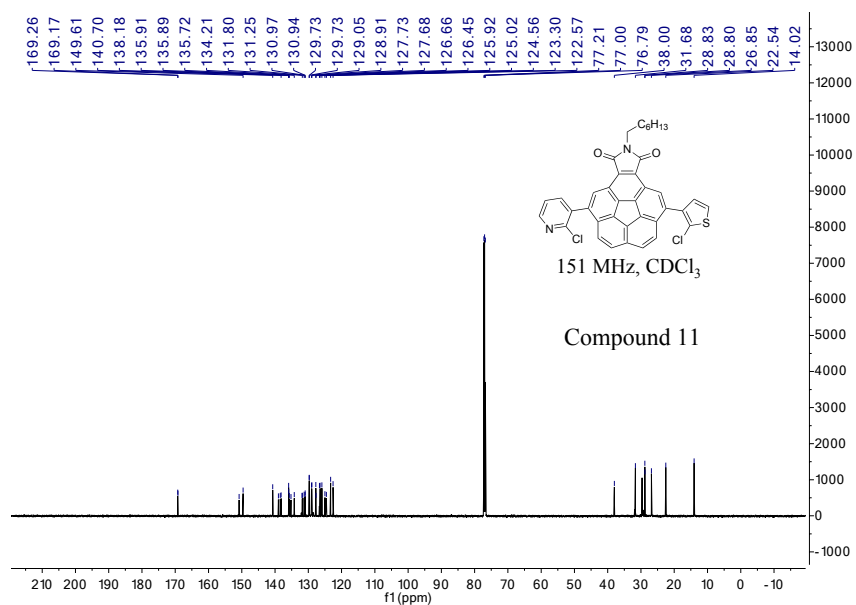

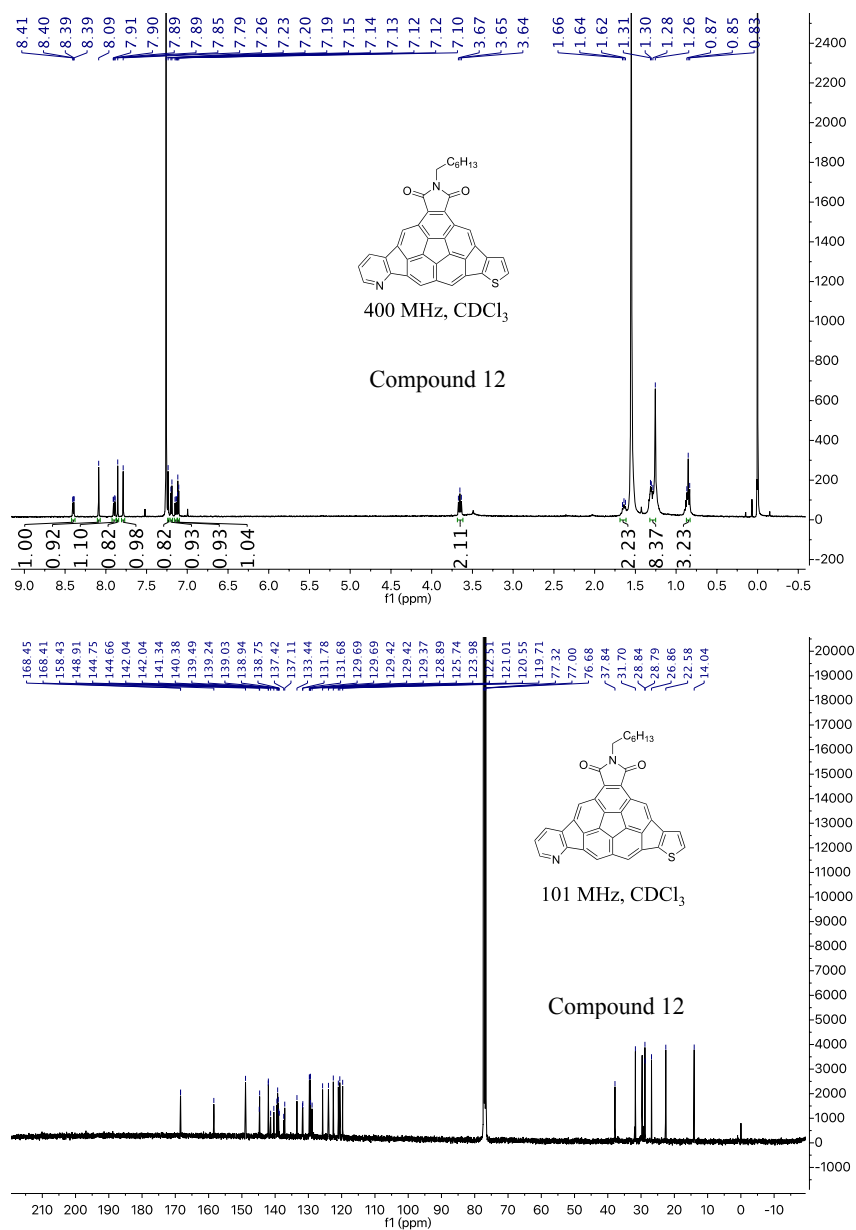

## 12. Onset wavelength ( $\lambda_{\text{onset}}$ ) determination

Onset wavelength is found by drawing a trend line on the UV absorption spectrum and a baseline, then the wavelength at the intercept point was used as  $\lambda_{\text{onset}}$ .

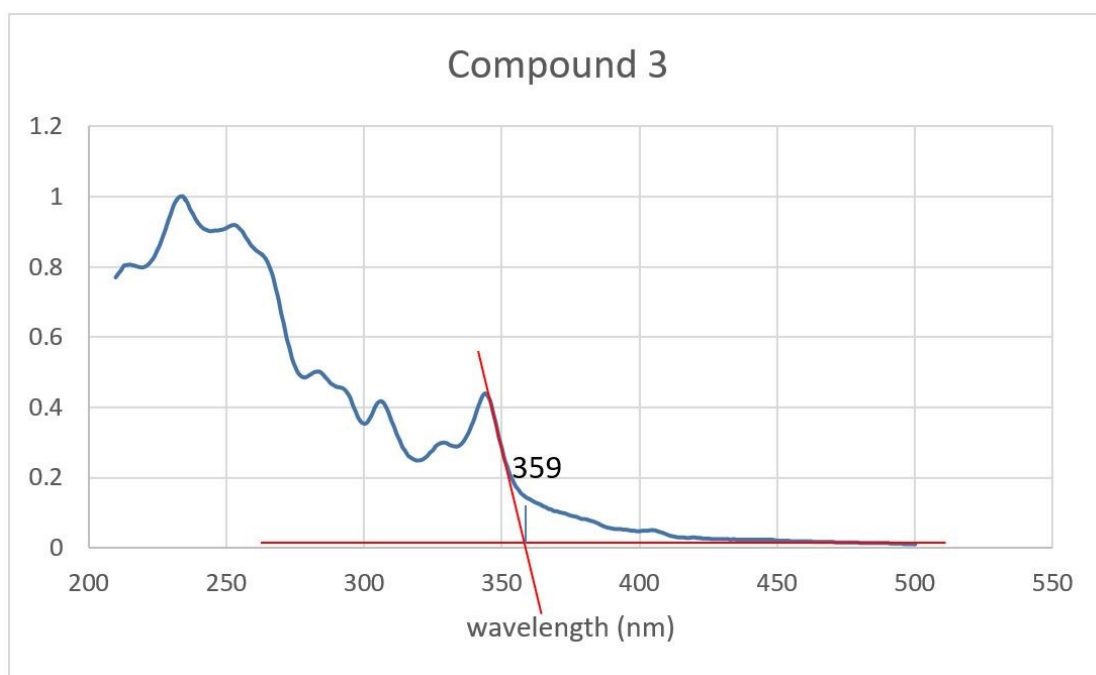

**Figure S21.** Onset wavelength determination of **3**

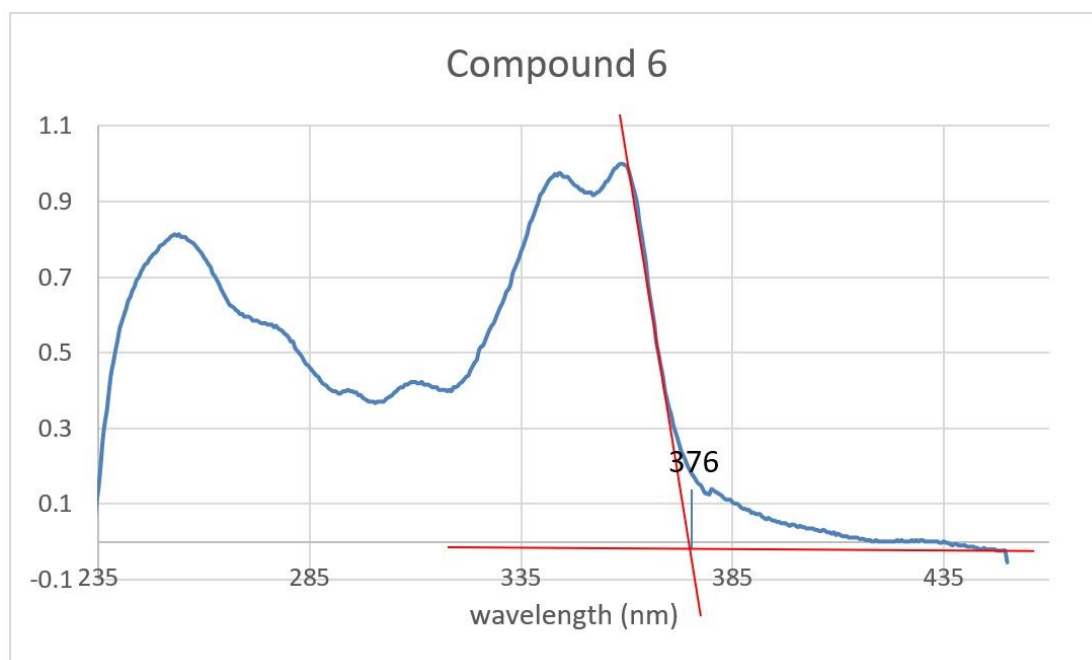

**Figure S22.** Onset wavelength determination of **6**

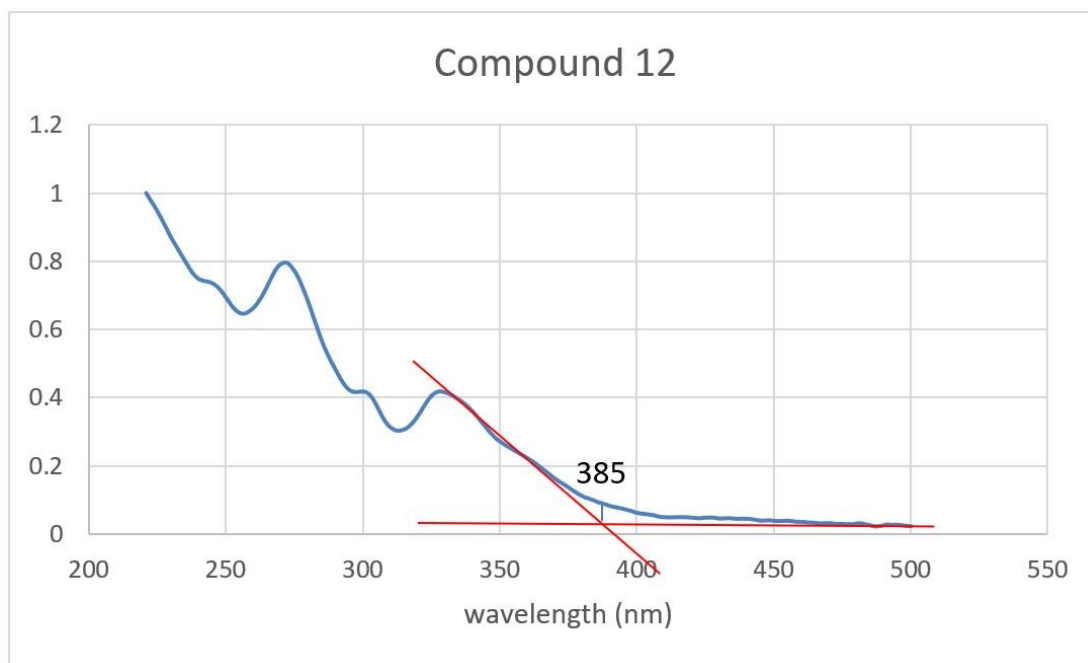

**Figure S22.** Onset wavelength determination of **12**

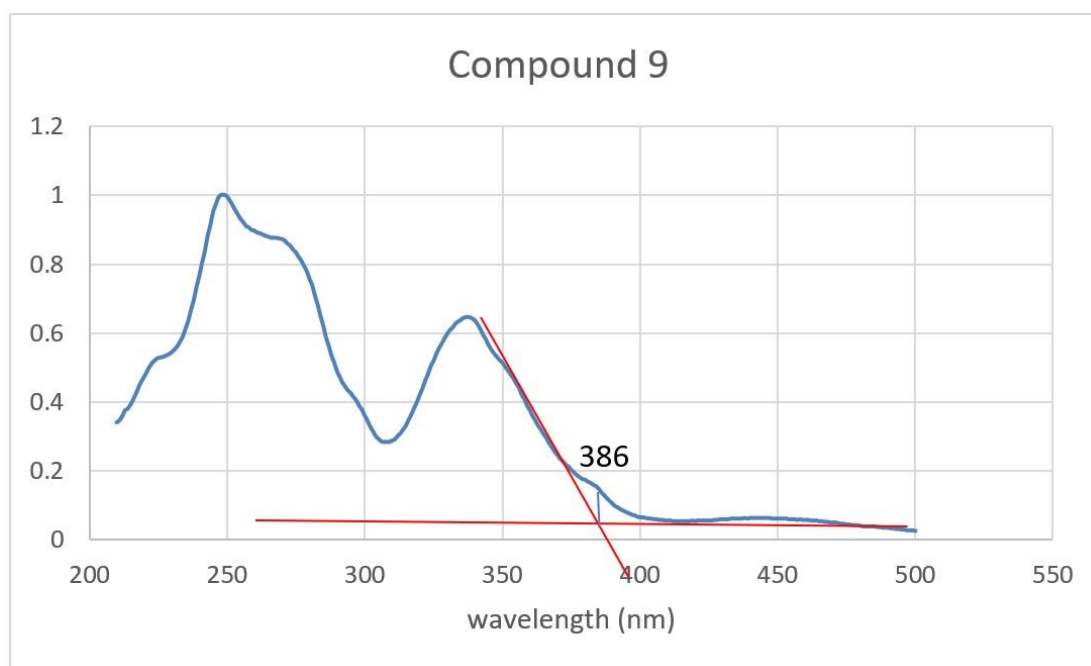

**Figure S23.** Onset wavelength determination of **9**

## 13. Literature

- (1) S. Grimme, *J. Comput. Chem.* **2006**, 27, 1787-1799.
- (2) S. Grimme, *J. Chem. Phys.* **2006**, 124, 034108-034115.
- (3) F. Weigend, R. Ahlrichs, *Phys. Chem. Chem. Phys.* **2005**, 7, 3297-3305.
- (4) J. D. Chai, M. Head-Gordon, *J. Chem. Phys.* **2008**, 128, 084106.
- (5) W. Strumm, J. J. Morgan, *Aquatic Chemistry: Chemical Equilibria and Rates in Natural Waters*, Wiley-Interscience, New York, 1996.
- (6) A. Klamt, G. Schüürmann, *J. Chem. Soc. Perkin Trans.* **1993**, 2, 799.
- (7) K. K. Baldrige, A. Klamt, *J. Chem. Phys.* **1997**, 106, 6622-6633.
- (8) A. Klamt, V. Jonas, T. Bürger, C. W. Lohrenz *J. Phys. Chem.* **1997**, 102, 5074.
- (9) M. D. Hanwell, D. E. Curtis, D. C. Lonie, T. Vandermeersch, E. Zurek, G. R. Hutchison, *J. Cheminform.* **2012**, 4, 17.
- (10) R. Dennington, T. Keith, J. Millam, *GaussView, Version 5*, Semichem Inc., Shawnee Mission, KS, 2009.
